# Supplementary material for: Multimorbidity as an important issue among women: results of a gender difference investigation in a large population-based cross-sectional study in West Asia
Source: PubMed Central journal article supplement — BMJ Open. 2017 May 9;7(5):e013548. doi: 10.1136/bmjopen-2016-013548 (PMC5623450; doi:10.1136/bmjopen-2016-013548), 2017-05-09
Supplement: bmjopen-2016-013548.draft_revisions.pdf [file bmjopen-2016-013548.draft_revisions.pdf]

# BMJ Open

## Multimorbidity: A Neglected Issue among Middle-Age people- Results of gender differences investigation in a Large Population-Based Cross-Sectional Study in West Asia

|                               |                                                                                                                                                                                                                                                                                                                                                                                                                                                                                                                                                                                                                                                                                                                                                                                                                                                                                                                                                                                                                                                                                                                                                                                                                                                                                                                                                                                                                                                                                                                                                                                                                                                                                                                                                                                                                                                                                                                                                                                                                                                                                                                                         |
|-------------------------------|-----------------------------------------------------------------------------------------------------------------------------------------------------------------------------------------------------------------------------------------------------------------------------------------------------------------------------------------------------------------------------------------------------------------------------------------------------------------------------------------------------------------------------------------------------------------------------------------------------------------------------------------------------------------------------------------------------------------------------------------------------------------------------------------------------------------------------------------------------------------------------------------------------------------------------------------------------------------------------------------------------------------------------------------------------------------------------------------------------------------------------------------------------------------------------------------------------------------------------------------------------------------------------------------------------------------------------------------------------------------------------------------------------------------------------------------------------------------------------------------------------------------------------------------------------------------------------------------------------------------------------------------------------------------------------------------------------------------------------------------------------------------------------------------------------------------------------------------------------------------------------------------------------------------------------------------------------------------------------------------------------------------------------------------------------------------------------------------------------------------------------------------|
| Journal:                      | <i>BMJ Open</i>                                                                                                                                                                                                                                                                                                                                                                                                                                                                                                                                                                                                                                                                                                                                                                                                                                                                                                                                                                                                                                                                                                                                                                                                                                                                                                                                                                                                                                                                                                                                                                                                                                                                                                                                                                                                                                                                                                                                                                                                                                                                                                                         |
| Manuscript ID                 | bmjopen-2016-013548                                                                                                                                                                                                                                                                                                                                                                                                                                                                                                                                                                                                                                                                                                                                                                                                                                                                                                                                                                                                                                                                                                                                                                                                                                                                                                                                                                                                                                                                                                                                                                                                                                                                                                                                                                                                                                                                                                                                                                                                                                                                                                                     |
| Article Type:                 | Research                                                                                                                                                                                                                                                                                                                                                                                                                                                                                                                                                                                                                                                                                                                                                                                                                                                                                                                                                                                                                                                                                                                                                                                                                                                                                                                                                                                                                                                                                                                                                                                                                                                                                                                                                                                                                                                                                                                                                                                                                                                                                                                                |
| Date Submitted by the Author: | 20-Jul-2016                                                                                                                                                                                                                                                                                                                                                                                                                                                                                                                                                                                                                                                                                                                                                                                                                                                                                                                                                                                                                                                                                                                                                                                                                                                                                                                                                                                                                                                                                                                                                                                                                                                                                                                                                                                                                                                                                                                                                                                                                                                                                                                             |
| Complete List of Authors:     | <p>Alimohammadian, Masoomeh ; Tehran University of Medical Sciences, Department of Human Ecology, School of Public Health<br/> Majidi, Azam; Tehran University of Medical Sciences, Digestive Diseases Research Institute<br/> Yaseri, Mehdi; Tehran University of Medical Sciences, Department of Epidemiology and Biostatistics<br/> Ahmadi, Batoul; Tehran University of Medical Sciences, Department of Health Management and Economics, School of Public Health<br/> Islami, Farhad; Institute for Translational Epidemiology and Tisch Cancer Institute,, Icahn School of Medicine at Mount Sinai<br/> Delavari, Alireza; Tehran University of Medical Sciences, Digestive Diseases Research Institute<br/> Amani, Mohammad; Tehran University of Medical Sciences, Digestive Diseases Research Institute<br/> Derakhshan, Mohammad<br/> Feyz-Sani, Akbar; Tehran University of Medical Sciences, Digestive Diseases Research Institute<br/> Poustchi, Hossein; Tehran University of Medical Sciences, Digestive Diseases Research Institute<br/> Pourshams, Akram; Tehran University of Medical Sciences, Digestive Diseases Research Institute<br/> Khoshnia, Masoud; Tehran University of Medical Sciences, Digestive Diseases Research Institute<br/> Qaravi, Samad; Tehran University of Medical Sciences, Digestive Diseases Research Institute<br/> Abnet, Christian; National Cancer Institute, Division of Cancer Epidemiology and Genetics<br/> Dawsey, Sanford; National Cancer Institute, NIH, Division of Cancer Epidemiology &amp; Genetics<br/> Brennan, Paul ; International Agency for Research on Cancer, Genetic Epidemiology Group<br/> Kamangar, Farin; Morgan State University, Department of Public Health Analysis, School of Community Health and Policy,<br/> Boffetta, Paolo; Institute for Translational Epidemiology and Tisch Cancer Institute, Icahn School of Medicine at Mount Sinai<br/> Sadjadi, Alireza; Tehran University of Medical Sciences, Digestive Diseases Research Institute<br/> Malekzadeh, Reza; Tehran University of Medical Sciences, Digestive Diseases Research Institute</p> |

1  
2  
3  
4  
5  
6  
7  
8  
9  
10  
11  
12  
13  
14  
15  
16  
17  
18  
19  
20  
21  
22  
23  
24  
25  
26  
27  
28  
29  
30  
31  
32  
33  
34  
35  
36  
37  
38  
39  
40  
41  
42  
43  
44  
45  
46  
47  
48  
49  
50  
51  
52  
53  
54  
55  
56  
57  
58  
59  
60

|                                   |                                                                         |
|-----------------------------------|-------------------------------------------------------------------------|
| <b>Primary Subject Heading:</b>   | Public health                                                           |
| <b>Secondary Subject Heading:</b> | Health policy                                                           |
| <b>Keywords:</b>                  | Multimorbidity, Ageing, Gender differences, Golestan Cohort Study, Iran |
|                                   |                                                                         |

SCHOLARONE™  
Manuscripts

For peer review only

1  
2  
3  
4  
5  
6  
7  
8  
9  
10  
11  
12  
13  
14

## Multimorbidity: A Neglected Issue among Middle-Age people- Results of gender differences investigation in a Large Population-Based Cross-Sectional Study in West Asia

Masoomeh Alimohammadian<sup>1,2,3∞</sup>, Azam Majidi<sup>2∞</sup>, Mehdi Yaseri<sup>4</sup>, Batoul Ahmadi<sup>5\*</sup> Farhad Islami<sup>1,6</sup>, Alireza Delavari<sup>1,2</sup>, Mohammad Amani<sup>1,2</sup>, Mohammad H. Derakhshan<sup>2,7</sup>, Akabar Feyz Sani<sup>1,2</sup>, Hossein Poustchi<sup>1,2</sup>, Akram Pourshams<sup>1,2,8</sup>, Masoud Khoshnia<sup>2,9</sup>, Samad Qaravi<sup>2,9</sup>, Christian C. Abnet<sup>10</sup>, Sanford M. Dawsey<sup>10</sup>, Paul Brennan<sup>11</sup>, Farin Kamangar<sup>1,12</sup>, Paolo Boffetta<sup>6</sup>, Alireza Sadjadi<sup>1,2\*</sup>, Reza Malekzadeh<sup>1,2</sup>

- 15 1. Digestive Disease Research Center, Digestive Diseases Research Institute, Tehran University of  
16 Medical Sciences, Tehran, Iran
- 17 2. Digestive Oncology Research Center, Digestive Diseases Research Institute, Tehran University of  
18 Medical Sciences, Tehran, Iran
- 19 3. Department of Human Ecology, School of Public Health, Tehran University of Medical Sciences,  
20 Tehran, Iran
- 21 4. Department of Epidemiology and Biostatistics, School of Public Health, Tehran University of  
22 Medical Sciences, Tehran, Iran
- 23 5. Department of Health Management and Economics, School of Public Health, Tehran University of  
24 Medical Sciences, Tehran, Iran
- 25 6. Institute for Translational Epidemiology and Tisch Cancer Institute, Icahn School of Medicine at  
26 Mount Sinai, NY, USA
- 27 7. Division of Cardiovascular and Medical Sciences, Section of Gastroenterology, University of  
28 Glasgow, Glasgow, UK.
- 29 8. Liver and Pancreaticbiliary Research center, Digestive Diseases Research Institute, Tehran  
30 University of Medical Sciences, Tehran, Iran
- 31 9. Golestan Research Center of Gastroenterology and Hepatology, Golestan University of Medical  
32 Sciences, Gorgan, Iran
- 33 10. Division of Cancer Epidemiology and Genetics, National Cancer Institute, Bethesda, MD, USA
- 34 11. International Agency for Research on Cancer, Genetic Epidemiology Group, Lyon, France
- 35 12. Department of Public Health Analysis, School of Community Health and Policy, Morgan State  
36 University, Baltimore, MD, USA

37  
38  
39  
40  
41  
42  
43  
44  
45  
46  
47  
48  
49  
50  
51  
52  
53  
54  
55  
56  
57  
58  
59  
60

∞ These authors contributed equally to the work and share first authorship

\* These authors share the corresponding position:

**Corresponding Authors:** Dr. Alireza Sadjadi: [sadjadia@gmail.com](mailto:sadjadia@gmail.com) and Dr. Batoul Ahmadi: [ahmadiba@tums.ac.ir](mailto:ahmadiba@tums.ac.ir)

**ABSTRACT:**

**Objectives:** Similar to other developing countries, transitions in lifestyle and health promotion have increased both, life-expectancy and the burden of chronic diseases in Iran.

**Design:** A cross-sectional analysis of Golestan cohort data

**Setting:** Community setting of Golestan Province, Iran

**Study population:** Residents of Golestan Province

**Main outcome measures:** This study investigates differences in multimorbidity and its determinants by gender and age-groups in northern Iran. Data were collected from 49,946 individuals (aged 40-75 years). Simple and multiple Poisson regression models with robust variances were used to examine the simultaneous effects of multiple factors.

**Results:** The overall prevalence of multimorbidity was 25.0% in women and 13.4% in men ( $p < 0.001$ ), and it was higher in women at all ages groups. Although multimorbidity was associated with age, its prevalence was considerable even among younger participants (17.3% in women and 8.6% in men  $< 50$  years). With regard to the prevalence of multimorbidity, several factors showed a statistically significant interaction with gender. Former-smoking and being of Non-Turkmen ethnic groups, married, or physical inactivity showed a significant or stronger association with multimorbidity in men. Being of lower socioeconomic groups was associated with multimorbidity prevalence only in women. Higher educational levels (compared to illiteracy) showed an inverse association mainly in women ( $p < 0.001$ ). Our study identified socioeconomic status, ethnicity, physical activity, marital status, educational level and smoking as determinants of gender differences in multimorbidity prevalence ( $p < 0.01$ ).

**Conclusion:** Regarding gender and socioeconomic disparities, prevention and control of multimorbidity require gender-specific health policies and interventions, particularly among younger and middle-age groups.

**Strengths and limitations of this study:**

- Strengths of this study include data from a large, population-based cohort study with detailed data on sociodemographic, lifestyle and behavioral risk factors.
- All data were collected by interactive face-to-face interviews conducted by trained medically qualified researcher.
- Cross-sectional data analyses are susceptible to residual confounding and cannot establish the direction of an association.

- 1  
2  
3  
4  
5  
6
- Another limitation of this investigation was “self- reporting method of gathered data, constraining us to access adequate documents about chronic diseases.

7 **Keywords:** Multimorbidity, Ageing, Gender differences, Golestan Cohort Study, Iran

8  
9 **SUMMARY:**

10 **What is already known about this subject?**

- 11  
12  
13  
14  
15
- Limited evidence exists about gender and age differences in multimorbidity in developing countries

16 **What does this study add?**

- 17  
18  
19  
20  
21  
22  
23  
24
- To address gender and age differences in multimorbidity in Iran as a sample developing country, we conducted a cross-sectional study in the baseline data of Golestan Cohort.
  - Socioeconomic/educational status, ethnicity, physical activity and smoking were significant determinants of gender differences

25 **How might this impact on clinical practice? (Recommendations for policy)**

- 26  
27  
28  
29  
30  
31  
32  
33  
34  
35  
36  
37  
38  
39  
40  
41  
42  
43  
44  
45  
46  
47  
48  
49  
50  
51  
52  
53  
54  
55  
56  
57  
58  
59  
60
- Our findings confirm that multimorbidity is an important neglected health issue even in middle-age groups
  - Control of multimorbidity require gender-specific health interventions, particularly in younger and middle-age groups

**INTRODUCTION:**

Chronic diseases not only cause physical and social complications in patients, but also they impose a huge burden on health systems. This burden could be further amplified by co-occurrence of two or more chronic diseases in one person, a condition that is known as multimorbidity [1-3]. Multimorbidity is associated with a higher mortality risk and increased utilization of healthcare services; therefore, it is a demanding situation for patients, their families, and healthcare providers [4-8].

In many developing countries, life expectancy has increased over the recent decades. On the other hand, the growing prevalence of multimorbidity has decreased the quality of life in patients with chronic diseases, especially in populations with limited resources [9, 10]. In cases of multimorbidity, the routine approach of dealing with a single disease at a time in the current clinical practice may lead to more unwanted side effects in patients and higher costs to patients and healthcare systems [11].

A limited number of studies have indicated a gender difference in patterns of multimorbidity [12]. This difference may be related to biological, socio-cultural, environmental, and economic factors. As these factors vary globally, their associations with multimorbidity may differ across populations [13-17]. Therefore more research needs to be conducted in this topic.

In an earlier study, we investigated the epidemiology of multimorbidity using the baseline data from the Golestan Cohort Study (GCS), a large-scale prospective study in West Asia [18]. In this article we applied numerous analyses to illuminate variability in the prevalence and determinants of multimorbidity in different ages, and also examine interactions between gender and multiple sociodemographic and lifestyle factors potentially associated with multimorbidity.

**METHODS:**

A total of 50,045 adults aged 40-75 years residing in Golestan province in northeastern Iran were enrolled in a cohort study from 2004 to 2008. The study protocol [19] and details of this study population are described elsewhere [18]. Trained staff used validated questionnaires to collect data on sociodemographic factors, lifestyle habits, occupation, physical activity, dietary habits, past medical history, and medications. A short physical exam was performed to measure blood pressure, height, and weight [19].

In this mainly rural population, physical activity was defined based on occupational activity and people were coded as “physically active” or “physically inactive”. Based on the two-step cluster

1  
2  
3 analysis using similarities of family assets, ethnicity, gender, employment status, appliance  
4 ownership, and surface area of the home, we categorized the socioeconomic status (SES) of  
5 participants as low, middle or high [20].  
6  
7

8  
9 In this analysis, we included 49,946 (99.8%) participants that were Iranian citizens and excluded  
10 non- Iranians job seekers or refugees. Here, multimorbidity refers to the self-reported co-  
11 occurrence of two or more chronic diseases (mostly related to aging) [18] in the same person [7,  
12 8, 21]. Based on the possibility of gathering valid self-reported data in the feasibility phase of  
13 GCS, self-reported information was collected for the following diseases: cardiovascular diseases  
14 (CVD), diabetes, chronic obstructive pulmonary disease (COPD), chronic kidney disease (CKD),  
15 chronic liver disease, tuberculosis (TB), gastroesophageal reflux disease (GERD), and cancers  
16 [19].  
17  
18  
19  
20  
21  
22  
23

24 **Statistical analysis:** We estimated the proportion of multimorbidity among study participants by  
25 several sociodemographic and lifestyle factors. To evaluate the differences in distribution of  
26 factors between genders, we used t-test, Mann-Whitney or chi-square tests, whenever  
27 appropriate. We used simple and multiple Poisson regressions with robust variances, following  
28 the method presented by Barros and Hirakata [22], to examine the association between the  
29 studied factors and multimorbidity and calculated crude and adjusted prevalence ratios and 95%  
30 confidence intervals (CIs) in two genders. The gender difference between determinants of  
31 multimorbidity (commonly known as interaction or effect modification) was evaluated in  
32 separate multiple Poisson regression models.  
33  
34  
35  
36  
37  
38  
39

40 In all analyses, the design effects were considered using the generalized estimating equations  
41 (GEE) method. All statistical analyses were performed using SPSS software (IBM Corp.  
42 Released 2013. IBM SPSS Statistics for Windows, version 22.0. Armonk, NY: IBM Corp.).  
43 Two-sided p-values below 0.05 were considered as statistically significant.  
44  
45  
46  
47

## 48 **RESULTS:**

49 A total of 49,946 participants aged 40-75 years were included in the study, which 28,748 (57.6%)  
50 of participants were women. The prevalence of self-reported chronic diseases in those with  
51 multimorbidity and the gender difference are presented in Table 1.  
52  
53  
54  
55  
56  
57  
58  
59  
60

Table 1: Chronic conditions by gender in population with multimorbidity in the Golestan Cohort Study (GCS)

| Chronic Conditions | Total<br>(N=10,035) |      | Men<br>(N=2,836) |      | Women<br>(N=7,199) |      | Difference<br>(Men vs. women) |
|--------------------|---------------------|------|------------------|------|--------------------|------|-------------------------------|
|                    | Number              | %    | Number           | %    | Number             | %    | %                             |
| GERD               | 7690                | 76.6 | 2030             | 71.6 | 5660               | 78.6 | -7.1*                         |
| CVD                | 7379                | 73.5 | 1927             | 67.9 | 5452               | 75.7 | -7.8*                         |
| Diabetes           | 2535                | 25.3 | 686              | 24.2 | 1849               | 25.7 | -1.5                          |
| COPD               | 2203                | 22.0 | 653              | 23.0 | 1550               | 21.5 | 1.5                           |
| TB                 | 1030                | 10.3 | 293              | 10.3 | 737                | 10.2 | 0.1                           |
| Cancers            | 102                 | 1.0  | 34               | 1.2  | 68                 | 0.9  | 0.3                           |
| CKD                | 72                  | 0.7  | 27               | 1.0  | 45                 | 0.6  | 0.3                           |
| Liver diseases     | 28                  | 0.3  | 11               | 0.4  | 17                 | 0.2  | 0.2                           |

\* P-value &lt;0.001

The overall prevalence of multimorbidity was 25.0% in women and 13.4% in men with a difference of 11.7% ( $p < 0.001$ ). We showed the prevalence of multimorbidity in all study participants by gender and sociodemographic and lifestyle factors in Table 2. The prevalence of multimorbidity in age less than 50 years was 17.3% in women and 8.6% in men, but it was 40.6% in women and 20.2% in men above 60 years.



Table 2: The multimorbidity prevalence by gender, separated in different levels of sociodemographic &amp; lifestyle factors

| Variables         | Levels              | Total (N=49,946) |      | Men <sup>2</sup> (N=21,198) |                  | Women <sup>2</sup> (N=28,748) |                   | Difference <sup>4</sup> |
|-------------------|---------------------|------------------|------|-----------------------------|------------------|-------------------------------|-------------------|-------------------------|
|                   |                     | No.              | %    | No.                         | %                | No.                           | %                 |                         |
| Age group         | ≤ 49                | 3215             | 13.9 | 779                         | 8.6 <sup>3</sup> | 2436                          | 17.3 <sup>3</sup> | -8.7*                   |
|                   | 50-60               | 3979             | 22.7 | 1040                        | 14.2             | 2939                          | 28.8              | -14.6*                  |
|                   | 61+                 | 2841             | 30.4 | 1017                        | 20.9             | 1824                          | 40.6              | -19.7*                  |
| Residential Area  | Urban               | 7740             | 20.2 | 2189                        | 13.3             | 5551                          | 25.4              | -12.2*                  |
|                   | Rural               | 2295             | 19.8 | 647                         | 13.8             | 1648                          | 23.9              | -10.0*                  |
| Ethnicity         | Turkmen             | 7308             | 19.6 | 2022                        | 12.6             | 5286                          | 24.9              | -12.3*                  |
|                   | others <sup>1</sup> | 2727             | 21.5 | 814                         | 15.8             | 1913                          | 25.4              | -9.5*                   |
| Marital Status    | Unmarried           | 8175             | 18.6 | 2756                        | 13.4             | 5419                          | 23.3              | -10.0*                  |
|                   | Married             | 1860             | 30.6 | 80                          | 14.2             | 1780                          | 32.3              | -18.1*                  |
| Education         | Illiterate          | 8194             | 23.4 | 1623                        | 15.6             | 6571                          | 26.7              | -11.1*                  |
|                   | ≤ 5 years           | 1151             | 13.6 | 650                         | 11.7             | 501                           | 17.3              | -5.5*                   |
|                   | 6-12 years          | 585              | 10.9 | 467                         | 10.8             | 118                           | 11.1              | -0.3                    |
|                   | University degree   | 105              | 9.9  | 96                          | 10.3             | 9                             | 6.9               | 3.5                     |
| Work Currently    | Yes                 | 8028             | 18.5 | 1989                        | 11.3             | 6039                          | 23.3              | -12.0*                  |
|                   | No                  | 2007             | 30.7 | 847                         | 23.1             | 1160                          | 40.5              | -17.4*                  |
| SES               | Good                | 3403             | 18.1 | 1103                        | 12.7             | 2300                          | 22.7              | -10.0*                  |
|                   | Medium              | 4921             | 20.5 | 1297                        | 13.3             | 3624                          | 25.4              | -12.1*                  |
|                   | Poor                | 1709             | 24.1 | 436                         | 15.9             | 1273                          | 29.2              | -13.3*                  |
| Physical Activity | Yes                 | 2100             | 13.3 | 1157                        | 10.2             | 943                           | 20.8              | -10.6*                  |
|                   | No                  | 7887             | 23.2 | 1673                        | 17.0             | 6214                          | 25.8              | -8.8*                   |
| BMI               | Underweight         | 413              | 17.4 | 175                         | 14.1             | 238                           | 21.0              | -6.9*                   |
|                   | Normal              | 2669             | 14.9 | 1081                        | 11.3             | 1588                          | 19.2              | -7.9*                   |
|                   | Overweight          | 3468             | 20.4 | 1045                        | 14.4             | 2423                          | 24.9              | -10.6*                  |
|                   | Obese               | 3482             | 27.4 | 534                         | 17.3             | 2948                          | 30.7              | -13.3*                  |
| Smoking           | Never               | 8713             | 21.1 | 1662                        | 12.8             | 7051                          | 24.9              | -12.1*                  |
|                   | Ex-smoker           | 676              | 21.2 | 621                         | 20.3             | 55                            | 44.0              | -23.7*                  |
|                   | Light smoker        | 364              | 11.1 | 298                         | 9.9              | 66                            | 25.5              | -15.6*                  |
|                   | Heavy smoker        | 281              | 13.0 | 255                         | 12.1             | 26                            | 44.8              | -32.7*                  |
| Other tobacco use | No                  | 872              | 19.7 | 663                         | 17.7             | 209                           | 30.8              | -13.1*                  |
|                   | Yes                 | 9163             | 20.1 | 2173                        | 12.5             | 6990                          | 24.9              | -12.4*                  |
| Opium             | No                  | 8112             | 19.6 | 1765                        | 11.7             | 6347                          | 24.0              | -12.3*                  |
|                   | Yes                 | 1923             | 22.7 | 1071                        | 17.4             | 852                           | 36.2              | -18.8*                  |
| Alcohol           | No                  | 9721             | 20.2 | 2527                        | 13.0             | 7194                          | 25.0              | -12.1*                  |
|                   | Yes                 | 314              | 18.2 | 309                         | 18.2             | 5                             | 25.0              | -6.8                    |

1. Other included: Persian, Turk, Sistani, Baluch and Kurdish; 2. number of men/women participants in GCS; 3. Number percentage) of multimorbidity among men/women population in the relevant variables level; 4. Men vs. women; \* p-value <0.001

1  
2  
3 The results from multiple Poisson regression models are shown in Table 3. The association  
4 between poor and middle socioeconomic status with multimorbidity prevalence was significantly  
5 stronger in women than men (p for interaction=0.033). On the other hand (based on p-value for  
6 interaction), the association between Non-Turkmen groups (0.003), being married (0.041),  
7 physical inactivity (0.009) and former smoking (0.033) and the prevalence of multimorbidity was  
8 statistically significant in men only, or was stronger in men than in women. There was an inverse  
9 association between education and multimorbidity prevalence mainly in women (p for  
10 interaction <0.001), although attending formal school for five or fewer years in men also showed  
11 a borderline, inverse association.  
12  
13  
14  
15  
16  
17  
18  
19  
20  
21  
22  
23  
24  
25  
26  
27  
28  
29  
30  
31  
32  
33  
34  
35  
36  
37  
38  
39  
40  
41  
42  
43  
44  
45  
46  
47  
48  
49  
50  
51  
52  
53  
54  
55  
56  
57  
58  
59  
60

Table 3: Crude and adjusted prevalence ratio (PR) based on simple and multiple Poisson regression

| Variables         | Levels             | Men   |               |                       |               | Women |               |                       |               | Interaction <sup>3</sup><br>P-value |
|-------------------|--------------------|-------|---------------|-----------------------|---------------|-------|---------------|-----------------------|---------------|-------------------------------------|
|                   |                    | Crude |               | Adjusted <sup>2</sup> |               | Crude |               | Adjusted <sup>2</sup> |               |                                     |
|                   |                    | PR    | 95% CI        | PR                    | 95% CI        | PR    | 95% CI        | PR                    | 95% CI        |                                     |
| Age group         | ≤49                | 1     |               | 1                     |               | 1     |               | 1                     |               | 0.282                               |
|                   | 50-60              | 1.64  | (1.50-1.80)** | 1.46                  | (1.32-1.61)** | 1.66  | (1.58-1.76)** | 1.51                  | (1.43-1.60)** |                                     |
|                   | 61+                | 2.42  | (2.20-2.65)** | 1.87                  | (1.67-2.10)** | 2.34  | (2.20-2.49)** | 2.06                  | (1.92-2.21)** |                                     |
| Residential Area  | Urban              | 1     |               | 1                     |               | 1     |               | 1                     |               | 0.280                               |
|                   | Rural              | 1.04  | (0.95-1.14)   | 0.93                  | (0.84-1.03)   | 0.94  | (0.89-0.99)*  | 0.98                  | (0.92-1.05)   |                                     |
| Ethnicity         | Turkmen            | 1     |               | 1                     |               | 1     |               | 1                     |               | 0.003                               |
|                   | Other <sup>1</sup> | 1.26  | (1.16-1.36)** | 1.24                  | (1.14-1.35)** | 1.02  | (0.97-1.07)   | 1.09                  | (1.03-1.15)*  |                                     |
| Marital Status    | Unmarried          | 1     |               | 1                     |               | 1     |               | 1                     |               | 0.042                               |
|                   | Married            | 0.94  | (0.75-1.18)   | 1.22                  | (0.97-1.54)   | 0.72  | (0.68-0.76)** | 0.98                  | (0.92-1.04)   |                                     |
| Education         | Illiterate         | 1     |               | 1                     |               | 1     |               | 1                     |               | 0.000                               |
|                   | ≤ 5 years          | 0.75  | (0.69-0.82)** | 0.91                  | (0.82-1.00)** | 0.65  | (0.59-0.71)** | 0.81                  | (0.73-0.89)** |                                     |
|                   | 6-12 years         | 0.69  | (0.63-0.77)** | 0.91                  | (0.80-1.03)   | 0.42  | (0.35-0.50)** | 0.57                  | (0.47-0.69)** |                                     |
|                   | University degree  | 0.66  | (0.54-0.81)** | 0.90                  | (0.72-1.13)   | 0.26  | (0.13-0.50)** | 0.37                  | (0.19-0.72)*  |                                     |
| Work Currently    | Yes                | 1     |               | 1                     |               | 1     |               | 1                     |               | 0.225                               |
|                   | No                 | 2.04  | (1.88-2.21)** | 1.35                  | (1.23-1.48)** | 1.74  | (1.63-1.85)** | 1.27                  | (1.18-1.35)** |                                     |
| SES               | Good               | 1     |               | 1                     |               | 1     |               | 1                     |               | 0.033                               |
|                   | Medium             | 1.05  | (0.97-1.14)   | 0.95                  | (0.86-1.05)   | 1.12  | (1.06-1.18)** | 1.08                  | (1.02-1.14)*  |                                     |
|                   | Poor               | 1.26  | (1.12-1.40)** | 1.04                  | (0.91-1.18)   | 1.28  | (1.20-1.38)** | 1.11                  | (1.03-1.19)*  |                                     |
| Physical Activity | Yes                | 1     |               | 1.00                  |               | 1     |               | 1.00                  |               | 0.009                               |
|                   | No                 | 1.66  | (1.54-1.79)** | 1.28                  | (1.18-1.39)** | 1.24  | (1.16-1.33)** | 1.12                  | (1.04-1.21)*  |                                     |
| BMI               | Normal             | 1     |               | 1                     |               | 1     |               | 1                     |               | 0.594                               |
|                   | Underweight        | 1.25  | (1.06-1.46)   | 1.04                  | (0.89-1.22)   | 1.09  | (0.95-1.25)   | 0.93                  | (0.81-1.07)   |                                     |
|                   | Overweight         | 1.28  | (1.17-1.39)** | 1.46                  | (1.34-1.60)** | 1.30  | (1.22-1.38)** | 1.43                  | (1.34-1.52)** |                                     |
|                   | Obese              | 1.54  | (1.39-1.71)** | 1.85                  | (1.66-2.06)** | 1.60  | (1.50-1.70)** | 1.87                  | (1.75-1.99)** |                                     |
| Smoking           | Never              | 1     |               | 1                     |               | 1     |               | 1                     |               | 0.033                               |
|                   | Ex-smoker          | 1.59  | (1.45-1.74)** | 1.25                  | (1.13-1.39)** | 1.77  | (1.35-2.30)** | 1.22                  | (0.93-1.59)   |                                     |
|                   | Light smoker       | 0.77  | (0.68-0.88)** | 0.78                  | (0.69-0.89)** | 1.02  | (0.80-1.30)   | 0.89                  | (0.70-1.14)   |                                     |
|                   | Heavy smoker       | 0.95  | (0.83-1.08)   | 0.87                  | (0.76-1.00)   | 1.80  | (1.22-2.64)** | 1.33                  | (0.90-1.96)   |                                     |
| Other tobacco use | No                 | 1     |               | 1                     |               | 1     |               | 1                     |               | 0.945                               |
|                   | Yes                | 1.42  | (1.30-1.55)** | 0.99                  | (0.89-1.09)   | 1.24  | (1.08-1.42)*  | 0.98                  | (0.85-1.13)   |                                     |
| Opium             | No                 | 1     |               | 1                     |               | 1     |               | 1                     |               | 0.558                               |
|                   | Yes                | 1.49  | (1.38-1.61)** | 1.50                  | (1.37-1.64)** | 1.51  | (1.40-1.62)** | 1.45                  | (1.35-1.57)** |                                     |
| Alcohol           | No                 | 1     |               | 1.00                  |               | 1     |               | 1.00                  |               | 0.401                               |
|                   | Yes                | 1.40  | (1.25-1.58)** | 1.31                  | (1.15-1.49)** | 1.00  | (0.42-2.40)   | 0.94                  | (0.39-2.25)   |                                     |

1. Other included Persian, Turk, Sistani, Baluch and Kurdish; 2. Prevalence ratios were adjusted for baseline variables; 3. Difference between sexes (P-value for interaction refers to Wald test),

\*\* : p-value <0.001; \* : p-value <0.01

**DISCUSSION:**

We examined gender-related determinants of multimorbidity in a cross-sectional analysis of a large cohort study with more than 49,000 participants. Overall prevalence of multimorbidity was higher in women at all ages. Multimorbidity was not only prevalent in elderly people; interestingly it also affected younger cohort participants gender interacted with sociodemographic factors including ethnicity, marital status, educational level, socioeconomic status, physical activity, and smoking in terms of the prevalence of multimorbidity.

Despite current perceptions, our study revealed that multimorbidity is not confined to elderly people, with even younger men and women cohort participants (age <50) suffering from this condition. Some studies have reported similar results but most are restricted to elderly people [23]. Our study showed that women had a greater burden of multimorbidity than men, consistent with Zielinski's report from a Swedish population [24]. One possible reason for higher rates of multimorbidity in women may be that they self-report more [25, 26]. According to Bertakis et al, women more often feel that their health is poor [27]. There is evidence that women use more health care facilities, particularly public funded health care than men [28, 29]. Other possible influences on this excess multimorbidity in women can be higher exposure to common risk factors for chronic diseases, or gender inequality in access to healthcare [7, 8, 12, 30-32].

We showed an association between low socioeconomic status (SES) and multimorbidity, which was statistically significant only for women. Earlier studies have associated low SES with higher multimorbidity [33, 34]. This may partly be explained by differences in lifestyle by SES. Low SES may reduce care-seeking in patients with chronic diseases [33]. This may produce a paradox, as lower usage of health care may translate to lower documented morbidity. Our finding that low and middle SES are associated with multimorbidity in women supports the assertion that women are at higher risk of adverse effects of poverty, payment inequality and health disparities [35]. Khanam et al also concluded that gender differences in SES, living and working environment, lifestyle factors and life-events may affect the occurrence and outcome of multimorbidity among women [36].

A previous study revealed that inactivity can increase the risk of breast and colorectal cancers, diabetes mellitus and ischemic heart diseases [37]. The findings of a study by Autenrieh et al. (2013) found an inverse association between physical activity and multimorbidity among men [26]. While in another study, multimorbidity was not associated with physical activity either in

1  
2  
3 men or women [38]. An association between sedentary occupations involving less physical  
4 activity and multimorbidity found in the current study which was more evident in men. This is  
5 may be due to the proportionately longer hours that men spent on their sedentary occupation.  
6  
7

8  
9 In this study, with increasing the level of education, the prevalence ratio of multimorbidity  
10 significantly decreased, and this effect was more obvious in women; similarly other studies  
11 showed a decreased likelihood of multimorbidity in better-educated populations [30, 32, 39].  
12

13  
14 GCS included participants above 40 years, whose cultural, educational and social basis shaped  
15 around 1970s during which there was limited access to primary healthcare (PHC) facilities  
16 especially in rural areas [40]. However, after 1980s there was a remarkable improvement in  
17 health, life expectancy and communicable diseases control and socioeconomic status in Iran [20,  
18 40]. Iran was among the few countries that reached WHO defined millennium development goals  
19 before 2015 [41]. As mentioned in the results education was defined as a protective factor for  
20 multimorbidity. Women's literacy rate in this population was less than 20% [19], while  
21 according to the latest reports women's literacy rate in Golestan province increased a great deal  
22 and reach to more than 80% [42]. These variations in health, education, and other socioeconomic  
23 status decreased health inequalities which may influence the pattern of diseases, including  
24 multimorbidity in the next generations. In this regard, Iran and similar countries need to adopt  
25 appropriate policies considering WHO recommendations.  
26  
27

28  
29 Access to affordable health services, as a human right, is a requirement for quality of life.  
30 Despite the considerable progress in communities' health over the recent decades, the prevalence  
31 of chronic diseases is increasing [43]. Some global movements related to healthy life, underlined  
32 the need for multi-dimensionality collaborations for health promotion, as stated in the Ottawa  
33 Charter. For instance "Healthy-cities" project tries to integrate modern technologies and  
34 following sedentary life, over and done with encouraging people to use healthy life methods,  
35 such as involving in physical activity programs, increase level of health awareness and education  
36 and decrease social and health inequalities [43-47]. Considering findings of this study and  
37 recommendations of WHO (World Health Organization) [43] for our environment, we need  
38 specific national and sub-national health policy programs for men and women in different age-  
39 groups and socioeconomic status.  
40  
41  
42  
43  
44  
45  
46  
47  
48  
49  
50  
51  
52  
53  
54

## 55 56 **CONCLUSION:**

57  
58  
59  
60

1  
2  
3 Our findings confirm that multimorbidity is an important neglected health issue in all age-  
4 groups, specifically in women with lower socioeconomic status and educational level. Also men  
5 with low physical activity and former smokers are at higher risk of multimorbidity.  
6  
7

8 Defining priority interventions and multi-sectorial policies to tackle multimorbidity in both men  
9 and women, particularly younger populations are required. A desirable intervention would be  
10 development of a national health benefit service package recommended by WHO, emphasizing  
11 on health promotion to prevention with suitable approaches to chronic diseases and  
12 multimorbidity.  
13  
14  
15  
16  
17

18 **Acknowledgments:** We wish to thank the study participants for their cooperation over many  
19 years and the Behvarz working in the study areas for their help.  
20  
21  
22

23 **Ethics approval:** This study was approved by the ethics committee of the Digestive Diseases  
24 Research Institute, Tehran University of Medical Sciences (OHRP-IRB-00001641).  
25  
26  
27

28 **Contributorship Statement:** MY analysed the data. MA and AM drafted the manuscript. AS,  
29 AM, MA, MA, MK, MHD provided scientific input. RM, FK, HP, AD, SQ provided expert  
30 clinical advice and interpretation of the data. PB, FK, RM, BA, AP, FI, PB, SMD provided  
31 expert guidance on health policy and delivery of healthcare and interpretation of the data. AS,  
32 MA, AM, FI were involved as methodologist in the interpretation of the research and the writing  
33 of the manuscript. All authors made critical revisions and provided intellectual content to the  
34 manuscript, approved the final version to be published and agreed to be accountable for all  
35 aspects of the work. AS and BA are the guarantor for this study.  
36  
37  
38  
39  
40  
41  
42

43 **Competing interests:** all the authors have no conflicts of interest to declare.  
44  
45

46 **Funding:** This study was supported by the Digestive Disease Research institute of Tehran  
47 University of Medical Sciences (grant No82–603) and in part, by the International Agency for  
48 Research on Cancer.  
49  
50  
51

52 **Data sharing statement:** No additional data is available.  
53  
54

55 **References:**  
56  
57  
58  
59  
60

1. Loza E, Jover JA, Rodriguez L, et al., editors. Multimorbidity: prevalence, effect on quality of life and daily functioning, and variation of this effect when one condition is a rheumatic disease. *Semin Arthritis Rheum*; 2009: Elsevier.
2. Van den Akker M, Buntinx F, Metsemakers JF, et al. Multimorbidity in general practice: prevalence, incidence, and determinants of co-occurring chronic and recurrent diseases. *J Clin Epidemiol*. 1998;51(5):367-75.
3. Violán C, Foguet-Boreu Q, Roso-Llorach A, et al. Burden of multimorbidity, socioeconomic status and use of health services across stages of life in urban areas: a cross-sectional study. *BMC Public Health*. 2014;14(1):530.
4. Alaba O, Chola L. The social determinants of multimorbidity in South Africa. *Int J Equity Health*. 2013;12:63.
5. Barnett K, Mercer SW, Norbury M, et al. Epidemiology of multimorbidity and implications for health care, research, and medical education: a cross-sectional study. *The Lancet*. 2012;380(9836):37-43.
6. Diederichs CP, Wellmann J, Bartels DB, et al. How to weight chronic diseases in multimorbidity indices? Development of a new method on the basis of individual data from five population-based studies. *J Clin Epidemiol*. 2012;65(6):679-85.
7. Foguet-Boreu Q, Violan C, Roso-Llorach A, et al. Impact of multimorbidity: acute morbidity, area of residency and use of health services across the life span in a region of south Europe. *BMC Fam Pract*. 2014;15(1):55.
8. Machado VdSS, Valadares ALR, Costa-Paiva LH, et al. Aging, obesity, and multimorbidity in women 50 years or older: a population-based study. *Menopause*. 2013;20(8):818-24.
9. Reza A, Rusk IS, Robab S. Aging in Iran: Past, Present and Future. *The Journal of Aging in Emerging Economies*. 2013;4(1):17-34.
10. WHO- Country profile: World Health Organization 2013 [cited 2015 Access Date: 29 Dec 2015]. Available from: <http://www.who.int/countries/irn/en/>.
11. Schäfer I, von Leitner E-C, Schön G, et al. Multimorbidity patterns in the elderly: a new approach of disease clustering identifies complex interrelations between chronic conditions. *PLoS One*. 2010;5(12):e15941.
12. Abad-Díez JM, Calderón-Larrañaga A, Poncel-Falcó A, et al. Age and gender differences in the prevalence and patterns of multimorbidity in the older population. *BMC Geriatr*. 2014;14(1):75.
13. Health topics: Women's health. World Health Organization.
14. Verdonk P, Klinge I. Mainstreaming sex and gender analysis in public health genomics. *Gen Med*. 2012;9(6):402-10.
15. Goldman MB. *Women and Health*. 2 ed. Goldman MB, Troisi R, Rexrode KM, editors. China: Elsevier/Academic Press; 2013. 1581.
16. T. SR. *An Overview of Women's Health: From the Past to the Future*. Epidemiology of Women's Health: Jones & Bartlett Publishers; 2013. 3-14.
17. Vlassoff C. Gender differences in determinants and consequences of health and illness. *J Health Popul Nutr*. 2007;25(1):47-61.
18. Ahmadi B, Alimohammadian M, Yaseri M, et al. Multimorbidity: Epidemiology and Risk Factors in the Golestan Cohort Study, Iran: A Cross-Sectional Analysis. *Medicine*. 2016;95(7):e2756.

19. Pourshams A, Khademi H, Malekshah AF, et al. Cohort profile: the Golestan Cohort Study—a prospective study of oesophageal cancer in northern Iran. *Int J Epidemiol*. 2010;39(1):52-9.
20. Islami F, Kamangar F, Nasrollahzadeh D, et al. Socio-economic status and oesophageal cancer: results from a population-based case–control study in a high-risk area. *Int J Epidemiol*. 2009;38(4):978-88.
21. Van Oostrom SH, Picavet HSJ, van Gelder BM, et al. Multimorbidity and comorbidity in the Dutch population—data from general practices. *BMC Public Health*. 2012;12(1):715.
22. Barros AJ, Hirakata VN. Alternatives for logistic regression in cross-sectional studies: an empirical comparison of models that directly estimate the prevalence ratio. *BMC Med Res Methodol*. 2003;3(1):1.
23. Taylor AW, Price K, Gill TK, et al. Multimorbidity - not just an older person's issue. Results from an Australian biomedical study. *BMC Public Health*. 2010;10:718.
24. Zielinski A, Halling A. Association between age, gender and multimorbidity level and receiving home health care: a population-based Swedish study. *BMC Res Notes*. 2015;8(1):714.
25. Murtagh KN, Hubert HB. Gender differences in physical disability among an elderly cohort. *Am J Public Health*. 2004;94(8):1406-11.
26. Autenrieth CS, Kirchberger I, Heier M, et al. Physical activity is inversely associated with multimorbidity in elderly men: results from the KORA-Age Augsburg Study. *Prev Med*. 2013;57(1):17-9.
27. Bertakis KD, Azari R, Helms LJ, et al. Gender differences in the utilization of health care services. *J Fam Pract*. 2000;49(2):147-.
28. Chen FM, Fryer GE, Norris TE. Effects of comorbidity and clustering upon referrals in primary care. *The Journal of the American Board of Family Practice*. 2005;18(6):449-52.
29. Forrest CB, Nutting PA, von Schrader S, et al. Primary care physician specialty referral decision making: patient, physician, and health care system determinants. *Med Decis Making*. 2006;26(1):76-85.
30. Afshar S, Roderick P, Kowal P, et al. Multimorbidity and the inequalities of global ageing: a cross-sectional study of 28 countries using the World Health Surveys. *BMC Public Health*. 2015;15(1):1-10.
31. Wang S, D'Arcy C, Yu Y, et al. Prevalence and patterns of multimorbidity in northeastern China: a cross-sectional study. *Public Health*. 2015;129(11):1539-46.
32. St John PD, Tyas SL, Menec V, et al. Multimorbidity, disability, and mortality in community-dwelling older adults. *Can Fam Physician*. 2014;60(5):e272-e80.
33. Wikström K, Lindström J, Harald K, et al. Clinical and lifestyle-related risk factors for incident multimorbidity: 10-year follow-up of Finnish population-based cohorts 1982–2012. *Eur J Intern Med*. 2015;26(3):211-6.
34. Kuo RN, Lai M-S. The influence of socio-economic status and multimorbidity patterns on healthcare costs: a six-year follow-up under a universal healthcare system. *Int J Equity Health*. 2013;12(1):69.
35. Wikström K, Lindström J, Tuomilehto J, et al. Socio-economic differences in dysglycemia and lifestyle-related risk factors in the Finnish middle-aged population. *The European Journal of Public Health*. 2011;21(6):768-74.



- 1  
2  
3  
4  
5  
6  
7  
8  
9  
10  
11  
12  
13  
14  
15  
16  
17  
18  
19  
20  
21  
22  
23  
24  
25  
26  
27  
28  
29  
30  
31  
32  
33  
34  
35  
36  
37  
38  
39  
40  
41  
42  
43  
44  
45  
46  
47  
48  
49  
50  
51  
52  
53  
54  
55  
56  
57  
58  
59  
60
36. Khanam MA, Streatfield PK, Kabir ZN, et al. Prevalence and patterns of multimorbidity among elderly people in rural Bangladesh: a cross-sectional study. *J Health Popul Nutr.* 2011;29(4):406.
37. Leischik R, Foshag P, Strauß M, et al. Physical activity, cardiorespiratory fitness and carotid intima thickness: sedentary occupation as risk factor for atherosclerosis and obesity. *Eur Rev Med Pharmacol Sci.* 2015;19(17):3157-68.
38. Hudon C, Soubhi H, Fortin M. Relationship between multimorbidity and physical activity: secondary analysis from the Quebec health survey. *BMC Public Health.* 2008;8(1):304.
39. Pache B, Vollenweider P, Waeber G, et al. Prevalence of measured and reported multimorbidity in a representative sample of the Swiss population. *BMC Public Health.* 2015;15(1):164.
40. Farzadi F, Ahmadi B, Shariati B, et al. Women's health: Explaining the trend in gender ratio in Iran over half a century (1956–2006). *Public Health.* 2010;124(2):86-9.
41. Moghaddam AV, Damari B, Alikhani S, et al. Health in the 5th 5-years Development Plan of Iran: main challenges, general policies and strategies. *Iranian journal of public health.* 2013;42(1):42.
42. Rashidian A, Karimi-Shahanjarini A, Khosravi A, et al. Iran' Multiple Indicator Demographic and Health Survey (IrMIDHS-2010): Study protocol. *Int J Prev Med.* 2014;5(5).
43. Leischik R, Dworrak B, Strauss M, et al. Plasticity of Health. *German Journal of Medicine.* 2016;1:1-17.
44. Awofeso N. The Healthy Cities approach: Reflections on a framework for improving global health. *Bull World Health Organ.* 2003;81(3):222-3.
45. Healthy Cities: World Health Organization; [cited 2016 Access Date: 20 March 2016]. Available from: <http://www.euro.who.int/en/health-topics/environment-and-health/urban-health/activities/healthy-cities>.
46. O'Neill M, Simard P. Choosing indicators to evaluate Healthy Cities projects: a political task? *Health Promotion International.* 2006;21(2):145-52.
47. Kickbusch I, Nutbeam D. *Health promotion glossary.* Geneva: World Health Organization. 1998.

1  
2  
3  
4  
5  
6  
7  
8  
9  
10  
11  
12  
13  
14  
15  
16  
17  
18  
19  
20  
21  
22  
23  
24  
25  
26  
27  
28  
29  
30  
31  
32  
33  
34  
35  
36  
37  
38  
39  
40  
41  
42  
43  
44  
45  
46  
47  
48  
49  
50  
51  
52  
53  
54  
55  
56  
57  
58  
59  
60

For peer review only

## STROBE Statement—checklist of items that should be included in reports of observational studies

|                              | Item No | Recommendation                                                                                                                                                                       | Page           |
|------------------------------|---------|--------------------------------------------------------------------------------------------------------------------------------------------------------------------------------------|----------------|
| <b>Title and abstract</b>    | 1       | (a) Indicate the study's design with a commonly used term in the title or the abstract                                                                                               | 1,2            |
|                              |         | (b) Provide in the abstract an informative and balanced summary of what was done and what was found                                                                                  | 2              |
| <b>Introduction</b>          |         |                                                                                                                                                                                      |                |
| Background/rationale         | 2       | Explain the scientific background and rationale for the investigation being reported                                                                                                 | 3              |
| Objectives                   | 3       | State specific objectives, including any pre-specified hypotheses                                                                                                                    | 3              |
| <b>Methods</b>               |         |                                                                                                                                                                                      |                |
| Study design                 | 4       | Present key elements of study design early in the paper                                                                                                                              | 3              |
| Setting                      | 5       | Describe the setting, locations, and relevant dates, including periods of recruitment, exposure, follow-up, and data collection                                                      | 3              |
|                              |         |                                                                                                                                                                                      | 4              |
| Participants                 | 6       | (a) <i>Cross-sectional study</i> —Give the eligibility criteria, and the sources and methods of selection of participants                                                            | 4              |
| Variables                    | 7       | Clearly define all outcomes, exposures, predictors, potential confounders, and effect modifiers. Give diagnostic criteria, if applicable                                             | 4              |
| Data sources/<br>measurement | 8*      | For each variable of interest, give sources of data and details of methods of assessment (measurement). Describe comparability of assessment methods if there is more than one group | 4              |
| Bias                         | 9       | Describe any efforts to address potential sources of bias                                                                                                                            | 3<br>(Ref. 19) |
| Study size                   | 10      | Explain how the study size was arrived at                                                                                                                                            | 3<br>(Ref. 19) |
| Quantitative variables       | 11      | Explain how quantitative variables were handled in the analyses. If applicable, describe which groupings were chosen and why                                                         | 4              |
| Statistical methods          | 12      | (a) Describe all statistical methods, including those used to control for confounding                                                                                                | 4              |
|                              |         | (b) Describe any methods used to examine subgroups and interactions                                                                                                                  | 4              |
|                              |         | (c) Explain how missing data were addressed                                                                                                                                          | 3<br>(Ref. 19) |
|                              |         | (d) <i>Cross-sectional study</i> —If applicable, describe analytical methods taking account of sampling strategy                                                                     | 3<br>(Ref. 19) |
|                              |         | (e) Describe any sensitivity analyses                                                                                                                                                | 3<br>(Ref. 19) |

Continued on next page

|                   |     |                                                                                                                                                                                                              |                                   |
|-------------------|-----|--------------------------------------------------------------------------------------------------------------------------------------------------------------------------------------------------------------|-----------------------------------|
| Results           |     |                                                                                                                                                                                                              |                                   |
| Participants      | 13* | (a) Report numbers of individuals at each stage of study—eg numbers potentially eligible, examined for eligibility, confirmed eligible, included in the study, completing follow-up, and analysed            | 3<br>(Ref. 19)                    |
|                   |     | (b) Give reasons for non-participation at each stage                                                                                                                                                         | 3<br>(Ref. 19)                    |
|                   |     | (c) Consider use of a flow diagram                                                                                                                                                                           | 3<br>(Ref. 19)                    |
| Descriptive data  | 14* | (a) Give characteristics of study participants (eg demographic, clinical, social) and information on exposures and potential confounders                                                                     | 3<br>(Ref. 19)<br>and<br>Table. 2 |
|                   |     | (b) Indicate number of participants with missing data for each variable of interest                                                                                                                          | N/A                               |
| Outcome data      | 15* | <i>Cross-sectional study</i> —Report numbers of outcome events or summary measures                                                                                                                           | 4                                 |
| Main results      | 16  | (a) Give unadjusted estimates and, if applicable, confounder-adjusted estimates and their precision (eg, 95% confidence interval). Make clear which confounders were adjusted for and why they were included | Table. 2                          |
|                   |     | (b) Report category boundaries when continuous variables were categorized                                                                                                                                    | N/A                               |
|                   |     | (c) If relevant, consider translating estimates of relative risk into absolute risk for a meaningful time period                                                                                             | N/A                               |
| Other analyses    | 17  | Report other analyses done—eg analyses of subgroups and interactions, and sensitivity analyses                                                                                                               | N/A                               |
| Discussion        |     |                                                                                                                                                                                                              |                                   |
| Key results       | 18  | Summarise key results with reference to study objectives                                                                                                                                                     | 5                                 |
| Limitations       | 19  | Discuss limitations of the study, taking into account sources of potential bias or imprecision. Discuss both direction and magnitude of any potential bias                                                   | 7                                 |
| Interpretation    | 20  | Give a cautious overall interpretation of results considering objectives, limitations, multiplicity of analyses, results from similar studies, and other relevant evidence                                   | 5                                 |
|                   |     |                                                                                                                                                                                                              | 6                                 |
|                   |     |                                                                                                                                                                                                              | 7                                 |
| Generalizability  | 21  | Discuss the generalisability (external validity) of the study results                                                                                                                                        | 7                                 |
|                   |     |                                                                                                                                                                                                              | 8                                 |
| Other information |     |                                                                                                                                                                                                              |                                   |
| Funding           | 22  | Give the source of funding and the role of the funders for the present study and, if applicable, for the original study on which the present article is based                                                | 8                                 |

# BMJ Open

## Multimorbidity: A Neglected Issue among Middle-Age people- Results of gender differences investigation in a Large Population-Based Cross-Sectional Study in West Asia

|                               |                                                                                                                                                                                                                                                                                                                                                                                                                                                                                                                                                                                                                                                                                                                                                                                                                                                                                                                                                                                                                                                                                                                                                                                                                                                                                                                                                                                                                                                                                                                                                                                                                                                                                                                                                                                                                                                                                                                                                                                                                                                                                                                                              |
|-------------------------------|----------------------------------------------------------------------------------------------------------------------------------------------------------------------------------------------------------------------------------------------------------------------------------------------------------------------------------------------------------------------------------------------------------------------------------------------------------------------------------------------------------------------------------------------------------------------------------------------------------------------------------------------------------------------------------------------------------------------------------------------------------------------------------------------------------------------------------------------------------------------------------------------------------------------------------------------------------------------------------------------------------------------------------------------------------------------------------------------------------------------------------------------------------------------------------------------------------------------------------------------------------------------------------------------------------------------------------------------------------------------------------------------------------------------------------------------------------------------------------------------------------------------------------------------------------------------------------------------------------------------------------------------------------------------------------------------------------------------------------------------------------------------------------------------------------------------------------------------------------------------------------------------------------------------------------------------------------------------------------------------------------------------------------------------------------------------------------------------------------------------------------------------|
| Journal:                      | <i>BMJ Open</i>                                                                                                                                                                                                                                                                                                                                                                                                                                                                                                                                                                                                                                                                                                                                                                                                                                                                                                                                                                                                                                                                                                                                                                                                                                                                                                                                                                                                                                                                                                                                                                                                                                                                                                                                                                                                                                                                                                                                                                                                                                                                                                                              |
| Manuscript ID                 | bmjopen-2016-013548.R1                                                                                                                                                                                                                                                                                                                                                                                                                                                                                                                                                                                                                                                                                                                                                                                                                                                                                                                                                                                                                                                                                                                                                                                                                                                                                                                                                                                                                                                                                                                                                                                                                                                                                                                                                                                                                                                                                                                                                                                                                                                                                                                       |
| Article Type:                 | Research                                                                                                                                                                                                                                                                                                                                                                                                                                                                                                                                                                                                                                                                                                                                                                                                                                                                                                                                                                                                                                                                                                                                                                                                                                                                                                                                                                                                                                                                                                                                                                                                                                                                                                                                                                                                                                                                                                                                                                                                                                                                                                                                     |
| Date Submitted by the Author: | 25-Nov-2016                                                                                                                                                                                                                                                                                                                                                                                                                                                                                                                                                                                                                                                                                                                                                                                                                                                                                                                                                                                                                                                                                                                                                                                                                                                                                                                                                                                                                                                                                                                                                                                                                                                                                                                                                                                                                                                                                                                                                                                                                                                                                                                                  |
| Complete List of Authors:     | <p>Alimohammadian, Masoomeh ; Tehran University of Medical Sciences, Department of Human Ecology, School of Public Health<br/>Majidi, Azam; Tehran University of Medical Sciences, Digestive Diseases Research Institute<br/>Yaseri, Mehdi; Tehran University of Medical Sciences, Department of Epidemiology and Biostatistics<br/>Ahmadi, Batoul; Tehran University of Medical Sciences, Department of Health Management and Economics, School of Public Health<br/>Islami, Farhad; Institute for Translational Epidemiology and Tisch Cancer Institute,, Icahn School of Medicine at Mount Sinai<br/>Delavari, Alireza; Tehran University of Medical Sciences, Digestive Diseases Research Institute<br/>Amani, Mohammad; Tehran University of Medical Sciences, Digestive Diseases Research Institute<br/>Derakhshan, Mohammad<br/>Feyz-Sani, Akbar; Tehran University of Medical Sciences, Digestive Diseases Research Institute<br/>Poustchi, Hossein; Tehran University of Medical Sciences, Digestive Diseases Research Institute<br/>Pourshams, Akram; Tehran University of Medical Sciences, Digestive Diseases Research Institute<br/>Sadjadi, Amir Mahdi<br/>Khoshnia, Masoud; Tehran University of Medical Sciences, Digestive Diseases Research Institute<br/>Qaravi, Samad; Tehran University of Medical Sciences, Digestive Diseases Research Institute<br/>Abnet, Christian; National Cancer Institute, Division of Cancer Epidemiology and Genetics<br/>Dawsey, Sanford; National Cancer Institute, NIH, Division of Cancer Epidemiology &amp; Genetics<br/>Brennan, Paul ; International Agency for Research on Cancer, Genetic Epidemiology Group<br/>Kamangar, Farin; Morgan State University, Department of Public Health Analysis, School of Community Health and Policy,<br/>Boffetta, Paolo; Institute for Translational Epidemiology and Tisch Cancer Institute, Icahn School of Medicine at Mount Sinai<br/>Sadjadi, Alireza; Tehran University of Medical Sciences, Digestive Diseases Research Institute<br/>Malekzadeh, Reza; Tehran University of Medical Sciences, Digestive Diseases Research Institute</p> |

1  
2  
3  
4  
5  
6  
7  
8  
9  
10  
11  
12  
13  
14  
15  
16  
17  
18  
19  
20  
21  
22  
23  
24  
25  
26  
27  
28  
29  
30  
31  
32  
33  
34  
35  
36  
37  
38  
39  
40  
41  
42  
43  
44  
45  
46  
47  
48  
49  
50  
51  
52  
53  
54  
55  
56  
57  
58  
59  
60

|                                   |                                                                         |
|-----------------------------------|-------------------------------------------------------------------------|
| <b>Primary Subject Heading:</b>   | Public health                                                           |
| <b>Secondary Subject Heading:</b> | Health policy                                                           |
| <b>Keywords:</b>                  | Multimorbidity, Ageing, Gender differences, Golestan Cohort Study, Iran |
|                                   |                                                                         |

SCHOLARONE™  
Manuscripts

For peer review only

1  
2  
3  
4  
5  
6  
7  
8  
9  
10  
11  
12  
13  
14

## Multimorbidity: A Neglected Issue among Middle-Age people- Results of gender differences investigation in a Large Population-Based Cross-Sectional Study in West Asia

Masoomah Alimohammadian<sup>1,2,3,∞</sup>, Azam Majidi<sup>1,2,∞</sup>, Mehdi Yaseri<sup>4</sup>, Batoul Ahmadi<sup>5\*</sup>, Farhad Islami<sup>1,6</sup>, Alireza Delavari<sup>1,2</sup>, Mohammad Amani<sup>1,2</sup>, Mohammad H. Derakhshan<sup>2,7</sup>, Akabar Feyz Sani<sup>1,2</sup>, Hossein Poustchi<sup>1,2</sup>, Akram Pourshams<sup>1,2,8</sup>, AmirMahdi Sadjadi<sup>1</sup>, Masoud Khoshnia<sup>2,9</sup>, Samad Qaravi<sup>2,9</sup>, Christian C. Abnet<sup>10</sup>, Sanford M. Dawsey<sup>10</sup>, Paul Brennan<sup>11</sup>, Farin Kamangar<sup>1,12</sup>, Paolo Boffetta<sup>6</sup>, Alireza Sadjadi<sup>1,2\*</sup>, Reza Malekzadeh<sup>1,2</sup>

- 15  
16  
17  
18  
19  
20  
21  
22  
23  
24  
25  
26  
27  
28  
29  
30  
31  
32  
33  
34  
35  
36  
37  
38  
39  
40  
41  
42  
43  
44  
45  
46  
47  
48  
49  
50
1. Digestive Diseases Research Center, Digestive Diseases Research Institute, Tehran University of Medical Sciences, Tehran, Iran
  2. Digestive Oncology Research Center, Digestive Diseases Research Institute, Tehran University of Medical Sciences, Tehran, Iran
  3. Department of Human Ecology, School of Public Health, Tehran University of Medical Sciences, Tehran, Iran
  4. Department of Epidemiology and Biostatistics, School of Public Health, Tehran University of Medical Sciences, Tehran, Iran
  5. Department of Health Management and Economics, School of Public Health, Tehran University of Medical Sciences, Tehran, Iran
  6. Institute for Translational Epidemiology and Tisch Cancer Institute, Icahn School of Medicine at Mount Sinai, NY, USA
  7. Division of Cardiovascular and Medical Sciences, Section of Gastroenterology, University of Glasgow, Glasgow, UK.
  8. Liver and Pancreaticobiliary Research center, Digestive Diseases Research Institute, Tehran University of Medical Sciences, Tehran, Iran
  9. Golestan Research Center of Gastroenterology and Hepatology, Golestan University of Medical Sciences, Gorgan, Iran
  10. Division of Cancer Epidemiology and Genetics, National Cancer Institute, Bethesda, MD, USA
  11. International Agency for Research on Cancer, Genetic Epidemiology Group, Lyon, France
  12. Department of Public Health Analysis, School of Community Health and Policy, Morgan State University, Baltimore, MD, USA

51  
52

<sup>∞</sup>These authors contributed equally to the work and share first authorship

53  
54

\* These authors share the corresponding position:

### Corresponding Authors:

55  
56  
57  
58  
59  
60

**Dr. Alireza Sadjadi:** [sadjadia@gmail.com](mailto:sadjadia@gmail.com) and **Dr. Batoul Ahmadi:** [ahmadiba@tums.ac.ir](mailto:ahmadiba@tums.ac.ir)

**ABSTRACT:****Objectives:**

Investigating the impact of gender and age-groups upon multimorbidity in northern Iran

**Design:** A cross-sectional analysis of Golestan cohort data.

**Setting:** Community setting of Golestan province, Iran

**Study population:** 49,946 individuals (aged 40-75 years)

**Main outcome measures:** Data related to Multimorbidity, defined as comorbidity of 2 or more chronic diseases, were collected in the beginning of a representative cohort study during 2003-2004. Simple and multiple Poisson regression models with robust variances were utilized to examine the simultaneous effects of multiple factors.

**Results:** The overall prevalence of multimorbidity was 25.0% in women and 13.4% in men ( $p < 0.001$ ), and it was higher in women at all ages groups. Although multimorbidity was associated with age, its prevalence was considerable even among younger participants (17.3% in women and 8.6% in men  $< 50$  years). With regard to the prevalence of multimorbidity, several factors showed a statistically significant interaction with gender. Former-smoking and being of Non-Turkmen ethnic groups, married, or physical inactivity showed a significantly stronger association with multimorbidity in men. Being of lower socioeconomic groups was associated with multimorbidity prevalence only in women. Higher educational levels (compared to illiteracy) showed an inverse association mainly in women ( $p < 0.001$ ). Our study identified socioeconomic status, ethnicity, physical activity, marital status, educational level and smoking as determinants of gender differences in multimorbidity prevalence ( $p < 0.01$ ).

**Conclusion:** Regarding gender and socioeconomic disparities, particularly among younger and middle-age groups, prevention and control of multimorbidity requires gender-specific health policies and interventions.

**Strengths and limitations of this study:**

- A large, population-based cohort study with detailed data on sociodemographic, lifestyle and behavioral risk factors provides a stronger insight to the analysis provided by this article.
- All data were collected by interactive face-to-face interviews conducted by trained medically qualified researcher.



- Cross-sectional data analyses are susceptible to residual confounding and cannot establish the direction of an association.
- Another limitation of this investigation was “self- reporting method of gathered data, constraining the research from accessing adequate documents about chronic diseases.

**Keywords:** Multimorbidity, Ageing, Gender differences, Golestan Cohort Study, Iran

## **SUMMARY:**

### **What is already known about this subject?**

- Limited evidence exists about gender and age differences in multimorbidity in developing countries

### **What does this study add?**

- To address gender and age differences in multimorbidity in Iran as a sample developing country, a cross-sectional study in the baseline data of Golestan Cohort was conducted.
- Socioeconomic/educational status, ethnicity, physical activity and smoking were significant determinants of gender differences

### **How might this impact on clinical practice? (Recommendations for policy)**

- The findings of this study confirm that multimorbidity is an important neglected health issue even in middle-age groups
- Control of multimorbidity require gender-specific health interventions, particularly in younger and middle-age groups

## INTRODUCTION:

Occurrence of chronic diseases is not only cause physical complications and social difficulties for the patient, but it also results in a huge burden upon the health systems. This issue could be further amplified by co-occurrence of two or more chronic diseases in one person, a condition that is known as multimorbidity.<sup>1-3</sup> Multimorbidity is associated with a higher mortality risk and increased utilization of healthcare services; therefore, it is a demanding situation for patients, their families, and healthcare providers.<sup>4-8</sup>

Despite the rise in life expectancy among the developing countries over the last decades, the growing prevalence of multimorbidity has led to a decreased quality of life in patients with chronic diseases, especially in populations with limited resources.<sup>9 10</sup> Patients with multimorbidity require specific medical care; however the current clinical practice lacks practical guidelines developed for management and treatment of patients who suffer from the mentioned condition.<sup>11</sup> In the current clinical practice, in cases of multimorbidity, the routine approach of dealing with a single disease at a time not only could cause higher cost to patients and healthcare systems but it also may lead to unwanted side effects.<sup>12</sup>

A limited number of studies have indicated a gender difference in patterns of multimorbidity.<sup>13</sup> This difference may be related to biological, socio-cultural, environmental, and economic factors. As these factors vary globally, their associations with multimorbidity may differ across populations.<sup>14-18</sup> Therefore, more research needs to be conducted in this topic.

The epidemiology of multimorbidity had been previously studied using the baseline data from the Golestan Cohort Study (GCS), a large-scale prospective study in Western Asia.<sup>19</sup> In this article we applied numerous analyses to illuminate variability in the prevalence and determinants of multimorbidity in different ages, and also further examine interactions between gender and multiple sociodemographic and lifestyle factors potentially associated with multimorbidity.

## METHODS:

A total of 50,045 adults aged 40-75 years residing in Golestan province in northeastern Iran were enrolled in a cohort study from 2004 to 2008. This analysis included 49,946 (99.8%) participants that were Iranian citizens and excluded non- Iranians job seekers or refugees. The study protocol<sup>20</sup> and details of this study population are described elsewhere.<sup>19</sup> Trained staff utilized validated questionnaires to collect data on sociodemographic factors, lifestyle habits, occupation,

1  
2  
3 physical activity, dietary habits, past medical history, and medications. A short physical exam  
4 was performed to measure blood pressure, height, and weight.<sup>20</sup>

5  
6  
7 In this mainly rural population, physical activity was defined based on occupational activity and  
8 people were coded as “physically active” or “physically inactive”. Based on the two-step cluster  
9 analysis using similarities of family assets, ethnicity, gender, employment status, appliance  
10 ownership, and surface area of the home, the socioeconomic status (SES) of participants was  
11 categorized as low, middle or high.<sup>21</sup>

12  
13  
14 Here, multimorbidity refers to the self-reported co-occurrence of two or more chronic diseases  
15 (non-acute conditions)<sup>19</sup> in the same person.<sup>7 8 22</sup> Based on the possibility of gathering valid self-  
16 reported data in the feasibility phase of GCS, self-reported information was collected for the  
17 following diseases: cardiovascular diseases (CVD), diabetes (type I and II), chronic obstructive  
18 pulmonary disease (COPD), chronic kidney disease (CKD), chronic liver disease, tuberculosis  
19 (TB), gastroesophageal reflux disease (GERD), and cancers.<sup>20</sup>

20  
21  
22 **Statistical analysis:** The proportion of multimorbidity among participants was estimated by  
23 several sociodemographic and lifestyle factors. In order to evaluate the differences in distribution  
24 of factors between genders, t-test, Mann-Whitney or chi-square tests, were applied whenever  
25 appropriate.

26  
27  
28 There are some occasions in which odds ratio could be misleading, thus a model was initiated  
29 which can provide the prevalence ratio. Simple and multiple Poisson regressions were used with  
30 robust variances, following the method presented by Barros and Hirakata<sup>23</sup>, in order to examine  
31 the association between the studied factors and multimorbidity and calculated crude and adjusted  
32 prevalence ratios and 95% confidence intervals (CIs) in two genders. The gender difference  
33 between determinants of multimorbidity (commonly known as interaction or effect modification)  
34 was evaluated in separate multiple Poisson regression models.

35  
36  
37 In all analyses, the design effects were considered using the generalized estimating equations  
38 (GEE) method. The GEE (Generalized Estimating Equation) is a generalization of the GLM that  
39 could handle the correlation of observation. The assumption of the GLM is the independence of  
40 observation which could be violated in studies where there are Intra cluster correlations in cluster  
41 sampling or randomization and in longitudinal analysis when repeated measurements are  
42 performed from a subject.<sup>24 25</sup> All statistical analyses were performed using SPSS software (IBM  
43  
44  
45  
46  
47  
48  
49  
50  
51  
52  
53  
54  
55  
56  
57  
58  
59  
60

1  
2  
3 Corp. Released 2013. IBM SPSS Statistics for Windows, version 22.0. Armonk, NY: IBM  
4 Corp.). Two-sided p-values below 0.05 were considered as statistically significant.  
5  
6  
7

## 8 **RESULTS:**

9  
10 A total of 49,946 participants aged 40-75 years were included in the study, which 28,748 (57.6%)  
11 of participants were women. The prevalence of self-reported chronic diseases in those with  
12 multimorbidity and the gender difference are presented in supplementary Table.  
13  
14

15 The overall prevalence of multimorbidity was 25.0% in women and 13.4% in men with a  
16 difference of 11.7% ( $p < 0.001$ ). Table 1 represents the prevalence of multimorbidity in all study  
17 participants by gender and sociodemographic and lifestyle factors. The prevalence of  
18 multimorbidity in age less than 50 years was 17.3% in women and 8.6% in men, but it was  
19 40.6% in women and 20.2% in men above 60 years.  
20  
21  
22  
23  
24  
25  
26  
27  
28  
29  
30  
31  
32  
33  
34  
35  
36  
37  
38  
39  
40  
41  
42  
43  
44  
45  
46  
47  
48  
49  
50  
51  
52  
53  
54  
55  
56  
57  
58  
59  
60

**Table 1: The multimorbidity prevalence by gender, separated in different levels of sociodemographic & lifestyle factors**

| Variables         | Levels              | Total               |                     | Men                 |                     | Women               |                     | Diff.**<br>% |
|-------------------|---------------------|---------------------|---------------------|---------------------|---------------------|---------------------|---------------------|--------------|
|                   |                     | Overall<br>N=49,946 | Multimorbidity<br>% | Overall<br>N=21,198 | Multimorbidity<br>% | Overall<br>N=28,748 | Multimorbidity<br>% |              |
| Age group         | 40-49               | 23074               | 13.9                | 9012                | 8.6                 | 14062               | 17.3                | -8.7*        |
|                   | 50-60               | 17512               | 22.7                | 7321                | 14.2                | 10191               | 28.8                | -14.6*       |
|                   | 61-75               | 9360                | 30.4                | 4865                | 20.9                | 4495                | 40.6                | -19.7*       |
| Residential Area  | Urban               | 38354               | 20.2                | 16514               | 13.3                | 21840               | 25.4                | -12.2*       |
|                   | Rural               | 11592               | 19.8                | 4684                | 13.8                | 6908                | 23.9                | -10.0*       |
| Ethnicity         | Turkmen             | 37253               | 19.6                | 16051               | 12.6                | 21202               | 24.9                | -12.3*       |
|                   | others <sup>1</sup> | 12693               | 21.5                | 5147                | 15.8                | 7546                | 25.4                | -9.5*        |
| Marital Status    | Unmarried           | 43873               | 18.6                | 20634               | 13.4                | 23239               | 23.3                | -10.0*       |
|                   | Married             | 6073                | 30.6                | 564                 | 14.2                | 5509                | 32.3                | -18.1*       |
| Education         | Illiterate          | 35060               | 23.4                | 10406               | 15.6                | 24654               | 26.7                | -11.1*       |
|                   | ≤ 5 years           | 8449                | 13.6                | 5545                | 11.7                | 2904                | 17.3                | -5.5*        |
|                   | 6-12 years          | 5376                | 10.9                | 4317                | 10.8                | 1059                | 11.1                | -0.3         |
|                   | University degree   | 1061                | 9.9                 | 930                 | 10.3                | 131                 | 6.9                 | 3.5          |
| Work Currently    | Yes                 | 43415               | 18.5                | 17529               | 11.3                | 25886               | 23.3                | -12.0*       |
|                   | No                  | 6530                | 30.7                | 3668                | 23.1                | 2862                | 40.5                | -17.4*       |
| SES               | Good                | 18831               | 18.1                | 8703                | 12.7                | 10128               | 22.7                | -10.0*       |
|                   | Medium              | 24001               | 20.5                | 9748                | 13.3                | 14253               | 25.4                | -12.1*       |
|                   | Poor                | 7105                | 24.1                | 2741                | 15.9                | 4364                | 29.2                | -13.3*       |
| Physical Activity | Yes                 | 15838               | 13.3                | 11308               | 10.2                | 4530                | 20.8                | -10.6*       |
|                   | No                  | 33947               | 23.2                | 9852                | 17.0                | 24095               | 25.8                | -8.8*        |
| BMI               | Underweight         | 2380                | 17.4                | 1245                | 14.1                | 1135                | 21.0                | -6.9*        |
|                   | Normal              | 17871               | 14.9                | 9596                | 11.3                | 8275                | 19.2                | -7.9*        |
|                   | Overweight          | 16993               | 20.4                | 7271                | 14.4                | 9722                | 24.9                | -10.6*       |
|                   | Obese               | 12694               | 27.4                | 3081                | 17.3                | 9613                | 30.7                | -13.3*       |
| Smoking           | Never               | 41323               | 21.1                | 13018               | 12.8                | 28305               | 24.9                | -12.1*       |
|                   | Ex-smoker           | 3189                | 21.2                | 3064                | 20.3                | 125                 | 44.0                | -23.7*       |
|                   | Light smoker        | 3272                | 11.1                | 3013                | 9.9                 | 259                 | 25.5                | -15.6*       |
|                   | Heavy smoker        | 2161                | 13.0                | 2103                | 12.1                | 58                  | 44.8                | -32.7*       |
| Other tobacco use | Yes                 | 4427                | 19.7                | 3749                | 17.7                | 678                 | 30.8                | -13.1*       |
|                   | No                  | 45519               | 20.1                | 17449               | 12.5                | 28070               | 24.9                | -12.4*       |
| Opium             | Yes                 | 8489                | 19.6                | 6138                | 11.7                | 2351                | 24.0                | -12.3*       |
|                   | No                  | 41457               | 22.7                | 15060               | 17.4                | 26397               | 36.2                | -18.8*       |
| Alcohol           | Yes                 | 1721                | 20.2                | 1701                | 13.0                | 20                  | 25.0                | -12.1*       |
|                   | No                  | 48225               | 18.2                | 19497               | 18.2                | 28728               | 25.0                | -6.8         |

1. Other included: Persian, Turk, Sistani, Baluch and Kurdish; \*\*. Men vs. women; \* p-value <0.001

1  
2  
3 The results from multiple Poisson regression models are shown in Table 2. The association  
4 between poor and middle socioeconomic status with multimorbidity prevalence was significantly  
5 stronger in women than men (p for interaction=0.033). On the other hand (based on p-value for  
6 interaction), the association between Non-Turkmen groups (0.003), being married (0.041),  
7 physical inactivity (0.009) and former smoking (0.033) and the prevalence of multimorbidity was  
8 statistically significant in men only, or was stronger in men than in women. There was an inverse  
9 association between education and multimorbidity prevalence mainly in women (p for  
10 interaction <0.001), although attending formal school for five or fewer years in men also showed  
11 a borderline, inverse association.  
12  
13  
14  
15  
16  
17  
18  
19  
20  
21  
22  
23  
24  
25  
26  
27  
28  
29  
30  
31  
32  
33  
34  
35  
36  
37  
38  
39  
40  
41  
42  
43  
44  
45  
46  
47  
48  
49  
50  
51  
52  
53  
54  
55  
56  
57  
58  
59  
60

**Table 2: Crude and adjusted prevalence ratio (PR) based on simple and multiple Poisson regression**

| Variables         | Levels             | Men   |               |                       |               | Women |               |                       |               | Interaction <sup>3</sup><br>P-value |
|-------------------|--------------------|-------|---------------|-----------------------|---------------|-------|---------------|-----------------------|---------------|-------------------------------------|
|                   |                    | Crude |               | Adjusted <sup>2</sup> |               | Crude |               | Adjusted <sup>2</sup> |               |                                     |
|                   |                    | PR    | 95% CI        | PR                    | 95% CI        | PR    | 95% CI        | PR                    | 95% CI        |                                     |
| Age group         | 40-49              | Ref.  |               | Ref.                  |               | Ref.  |               | Ref.                  |               | 0.282                               |
|                   | 50-60              | 1.64  | (1.50-1.80)** | 1.46                  | (1.32-1.61)** | 1.66  | (1.58-1.76)** | 1.51                  | (1.43-1.60)** |                                     |
|                   | 61-75              | 2.42  | (2.20-2.65)** | 1.87                  | (1.67-2.10)** | 2.34  | (2.20-2.49)** | 2.06                  | (1.92-2.21)** |                                     |
| Residential Area  | Urban              | Ref.  |               | Ref.                  |               | Ref.  |               | Ref.                  |               | 0.280                               |
|                   | Rural              | 1.04  | (0.95-1.14)   | 0.93                  | (0.84-1.03)   | 0.94  | (0.89-0.99)*  | 0.98                  | (0.92-1.05)   |                                     |
| Ethnicity         | Turkmen            | Ref.  |               | Ref.                  |               | Ref.  |               | Ref.                  |               | 0.003                               |
|                   | Other <sup>1</sup> | 1.26  | (1.16-1.36)** | 1.24                  | (1.14-1.35)** | 1.02  | (0.97-1.07)   | 1.09                  | (1.03-1.15)*  |                                     |
| Marital Status    | Unmarried          | Ref.  |               | Ref.                  |               | Ref.  |               | Ref.                  |               | 0.042                               |
|                   | Married            | 0.94  | (0.75-1.18)   | 1.22                  | (0.97-1.54)   | 0.72  | (0.68-0.76)** | 0.98                  | (0.92-1.04)   |                                     |
| Education         | Illiterate         | Ref.  |               | Ref.                  |               | Ref.  |               | Ref.                  |               | 0.000                               |
|                   | ≤ 5 years          | 0.75  | (0.69-0.82)** | 0.91                  | (0.82-1.00)** | 0.65  | (0.59-0.71)** | 0.81                  | (0.73-0.89)** |                                     |
|                   | 6-12 years         | 0.69  | (0.63-0.77)** | 0.91                  | (0.80-1.03)   | 0.42  | (0.35-0.50)** | 0.57                  | (0.47-0.69)** |                                     |
|                   | University degree  | 0.66  | (0.54-0.81)** | 0.90                  | (0.72-1.13)   | 0.26  | (0.13-0.50)** | 0.37                  | (0.19-0.72)*  |                                     |
| Work Currently    | Yes                | Ref.  |               | Ref.                  |               | Ref.  |               | Ref.                  |               | 0.225                               |
|                   | No                 | 2.04  | (1.88-2.21)** | 1.35                  | (1.23-1.48)** | 1.74  | (1.63-1.85)** | 1.27                  | (1.18-1.35)** |                                     |
| SES               | Good               | Ref.  |               | Ref.                  |               | Ref.  |               | Ref.                  |               | 0.033                               |
|                   | Medium             | 1.05  | (0.97-1.14)   | 0.95                  | (0.86-1.05)   | 1.12  | (1.06-1.18)** | 1.08                  | (1.02-1.14)*  |                                     |
|                   | Poor               | 1.26  | (1.12-1.40)** | 1.04                  | (0.91-1.18)   | 1.28  | (1.20-1.38)** | 1.11                  | (1.03-1.19)*  |                                     |
| Physical Activity | Yes                | Ref.  |               | Ref.                  |               | Ref.  |               | Ref.                  |               | 0.009                               |
|                   | No                 | 1.66  | (1.54-1.79)** | 1.28                  | (1.18-1.39)** | 1.24  | (1.16-1.33)** | 1.12                  | (1.04-1.21)*  |                                     |
| BMI               | Normal             | Ref.  |               | Ref.                  |               | Ref.  |               | Ref.                  |               | 0.594                               |
|                   | Underweight        | 1.25  | (1.06-1.46)   | 1.04                  | (0.89-1.22)   | 1.09  | (0.95-1.25)   | 0.93                  | (0.81-1.07)   |                                     |
|                   | Overweight         | 1.28  | (1.17-1.39)** | 1.46                  | (1.34-1.60)** | 1.30  | (1.22-1.38)** | 1.43                  | (1.34-1.52)** |                                     |
|                   | Obese              | 1.54  | (1.39-1.71)** | 1.85                  | (1.66-2.06)** | 1.60  | (1.50-1.70)** | 1.87                  | (1.75-1.99)** |                                     |
| Smoking           | Never              | Ref.  |               | Ref.                  |               | Ref.  |               | Ref.                  |               | 0.033                               |
|                   | Ex-smoker          | 1.59  | (1.45-1.74)** | 1.25                  | (1.13-1.39)** | 1.77  | (1.35-2.30)** | 1.22                  | (0.93-1.59)   |                                     |
|                   | Light smoker       | 0.77  | (0.68-0.88)** | 0.78                  | (0.69-0.89)** | 1.02  | (0.80-1.30)   | 0.89                  | (0.70-1.14)   |                                     |
|                   | Heavy smoker       | 0.95  | (0.83-1.08)   | 0.87                  | (0.76-1.00)   | 1.80  | (1.22-2.64)** | 1.33                  | (0.90-1.96)   |                                     |
| Other tobacco use | No                 | Ref.  |               | Ref.                  |               | Ref.  |               | Ref.                  |               | 0.945                               |
|                   | Yes                | 1.42  | (1.30-1.55)** | 0.99                  | (0.89-1.09)   | 1.24  | (1.08-1.42)*  | 0.98                  | (0.85-1.13)   |                                     |
| Opium             | No                 | Ref.  |               | Ref.                  |               | Ref.  |               | Ref.                  |               | 0.558                               |
|                   | Yes                | 1.49  | (1.38-1.61)** | 1.50                  | (1.37-1.64)** | 1.51  | (1.40-1.62)** | 1.45                  | (1.35-1.57)** |                                     |
| Alcohol           | No                 | Ref.  |               | Ref.                  |               | Ref.  |               | Ref.                  |               | 0.401                               |
|                   | Yes                | 1.40  | (1.25-1.58)** | 1.31                  | (1.15-1.49)** | 1.00  | (0.42-2.40)   | 0.94                  | (0.39-2.25)   |                                     |

1. Other included Persian, Turk, Sistani, Baluch and Kurdish; 2. Prevalence ratios were adjusted for baseline variables; 3. Difference between sexes (P-value for interaction refers to Wald test),

\*\* : p-value <0.001; \* : p-value <0.01

## DISCUSSION:

This study examined gender-related determinants of multimorbidity in a cross-sectional analysis of a large cohort study with more than 49,000 participants. Overall prevalence of multimorbidity was shown to be higher in women at all ages. Multimorbidity was not only prevalent in elderly people; interestingly it also affected younger cohort participants. Gender interacted with sociodemographic factors including ethnicity, marital status, educational level, socioeconomic status, physical activity, and smoking in terms of the prevalence of multimorbidity. Past smoking habit, being of Non-Turkmen ethnic groups, being married or physically inactive showed a significant association with multimorbidity in men. Being of lower socioeconomic groups was associated with multimorbidity prevalence only in women.

Despite current perceptions, this study revealed that multimorbidity is not confined to elderly people, since even the younger men and women among the cohort participants (age <50) also suffered from this condition. Some studies have reported similar results but most are restricted to elderly people.<sup>26</sup> This research presented that women had a greater burden of multimorbidity than men, consistent with Zielinski's report from a Swedish population.<sup>27</sup> A potential cause for more significant prevalence of multimorbidity among women could be their relatively higher tendency to share their conditions in self-reports.<sup>28 29</sup> According to Bertakis et al, women more often feel that their health is poor.<sup>30</sup> There is evidence that women use more health care facilities, particularly public funded health care in comparison to men.<sup>31 32</sup> Other possible influences on this excess multimorbidity in women can be higher exposure to common risk factors for chronic diseases, or gender inequality in access to healthcare.<sup>7 8 13 33-35</sup>

The study showed an association between low socioeconomic status (SES) and multimorbidity, which was significantly associated with being women. Earlier studies have associated low SES with higher multimorbidity.<sup>36 37</sup> This may partly be explained by differences in lifestyle by SES. Low SES may reduce care-seeking in patients with chronic disease.<sup>36</sup> This may produce a paradox, as lower usage of health care may translate to lower documented morbidity. This study's findings which indicated that low and middle SES are associated with multimorbidity in women supports the assertion that women are at higher risk of adverse effects of poverty, payment inequality and health disparities.<sup>38</sup> Khanam et al. also concluded that gender differences in SES, living and working environment, lifestyle factors and life-events may affect the occurrence and outcome of multimorbidity among women.<sup>39</sup>



1  
2  
3  
4 A previous study revealed that inactivity may increase the risk of breast and colorectal cancers,  
5 diabetes mellitus and ischemic heart diseases.<sup>40</sup> The findings of a study by Autenrieh et al.  
6 (2013) discovered an inverse association between physical activity and multimorbidity among  
7 men.<sup>29</sup> While in another study, multimorbidity was not associated with physical activity either in  
8 men or women.<sup>41</sup> An association between sedentary occupations involving less physical activity  
9 and multimorbidity found in the current study which was more evident in men. This may be due  
10 to the proportionately longer hours that men spent on their sedentary occupation.

11  
12 In this study, with increasing the level of education, the prevalence ratio of multimorbidity  
13 significantly decreased, and this association was more obvious in women; similarly other studies  
14 showed a decreased likelihood of multimorbidity in better-educated populations.<sup>33 35 42</sup>

15  
16 GCS included participants above 40 years, whose cultural, educational and social basis shaped  
17 around 1970s during which there was limited access to primary healthcare (PHC) facilities  
18 especially in rural area.<sup>43</sup> However, after 1980s there was a remarkable improvement in health,  
19 life expectancy and communicable diseases control and socioeconomic status in Iran.<sup>21 43</sup> Iran  
20 was among the few countries that reached WHO defined millennium development goals before  
21 2015.<sup>44</sup> As mentioned in the results, education was defined as a protective factor for  
22 multimorbidity. Women's literacy rate in this population was less than 20%<sup>20</sup>, while according  
23 to the latest reports women's literacy rate in Golestan province increased a great deal and reach  
24 to an excess of 80%.<sup>45</sup> These variations in health, education, and other socioeconomic status  
25 decreased health inequalities which may be influential to the pattern of diseases, including  
26 multimorbidity in the next generations. In this regard, Iran and similar countries need to adopt  
27 appropriate policies considering WHO recommendations.

28  
29 Access to affordable health services, as a human right, is a necessity for a better quality of life.  
30 Despite the considerable progress in communities' health over the recent decades, the prevalence  
31 of chronic diseases is increasing.<sup>46</sup> Some global movements related to healthy life, underlined the  
32 need for multi-dimensionality collaborations for health promotion, as stated in the Ottawa  
33 Charter. For instance "Healthy-cities" project tries to integrate modern technologies and  
34 following sedentary life, over and done with encouraging people to use healthy life methods,  
35 such as involving in physical activity programs, increase level of health awareness and education  
36 and decrease social and health inequalities.<sup>46-50</sup> Considering findings of this study and  
37 recommendations of WHO (World Health Organization)<sup>46</sup> for the environment, a specific  
38  
39  
40  
41  
42  
43  
44  
45  
46  
47  
48  
49  
50  
51  
52  
53  
54  
55  
56  
57  
58  
59  
60

1  
2  
3 national and sub-national health policy programs for men and women in different age-groups and  
4 socioeconomic status is required.  
5  
6

## 7 8 **CONCLUSION:**

9  
10 The findings of this study confirm that multimorbidity is an important neglected health issue in  
11 all age-groups, specifically in women with lower socioeconomic status and educational level.  
12 Also men with low physical activity and former smokers are at higher risk of multimorbidity.  
13 Defining priority interventions and multi-sectorial policies to tackle multimorbidity in both men  
14 and women, particularly younger populations are required. A desirable intervention would be  
15 development of a national health benefit service package recommended by WHO, emphasizing  
16 on health promotion to prevention with suitable approaches to chronic diseases and  
17 multimorbidity.  
18  
19  
20  
21  
22  
23

24  
25 **Acknowledgments:** We wish to thank the study participants for their cooperation over many  
26 years and the Behvarz working in the study areas for their help.  
27  
28

29  
30 **Ethics approval:** This study was approved by the ethics committee of the Digestive Diseases  
31 Research Institute, Tehran University of Medical Sciences (OHRP-IRB-00001641).  
32  
33

34  
35 **Contributorship Statement:** MY analyzed the data. MA, AM and AMS drafted the manuscript.  
36 AS, AM, MA, MA, MK, MHD provided scientific input. RM, FK, HP, AD, SQ provided expert  
37 clinical advice and interpretation of the data. PB, FK, RM, BA, AP, FI, PB, SMD provided  
38 expert guidance on health policy and delivery of healthcare and interpretation of the data. AS,  
39 MA, AM, FI were involved as methodologist in the interpretation of the research and the writing  
40 of the manuscript. All authors made critical revisions and provided intellectual content to the  
41 manuscript, approved the final version to be published and agreed to be accountable for all  
42 aspects of the work. AS and BA are the guarantor for this study.  
43  
44  
45  
46  
47  
48

49  
50 **Competing interests:** all the authors have no conflicts of interest to declare.  
51

52  
53 **Funding:** This study was supported by the Digestive Disease Research institute of Tehran  
54 University of Medical Sciences (grant No82–603) and in part, by the International Agency for  
55 Research on Cancer.  
56  
57  
58  
59  
60

**Data sharing statement:** No additional data is available.

## References:

1. Loza E, Jover JA, Rodriguez L, et al. Multimorbidity: prevalence, effect on quality of life and daily functioning, and variation of this effect when one condition is a rheumatic disease. *Semin Arthritis Rheum*; 2009. Elsevier.
2. Van den Akker M, Buntinx F, Metsemakers JF, et al. Multimorbidity in general practice: prevalence, incidence, and determinants of co-occurring chronic and recurrent diseases. *J Clin Epidemiol* 1998;**51**(5):367-75.
3. Violán C, Foguet-Boreu Q, Roso-Llorach A, et al. Burden of multimorbidity, socioeconomic status and use of health services across stages of life in urban areas: a cross-sectional study. *BMC Public Health* 2014;**14**(1):530.
4. Alaba O, Chola L. The social determinants of multimorbidity in South Africa. *Int J Equity Health* 2013;**12**:63.
5. Barnett K, Mercer SW, Norbury M, et al. Epidemiology of multimorbidity and implications for health care, research, and medical education: a cross-sectional study. *The Lancet* 2012;**380**(9836):37-43.
6. Diederichs CP, Wellmann J, Bartels DB, et al. How to weight chronic diseases in multimorbidity indices? Development of a new method on the basis of individual data from five population-based studies. *J Clin Epidemiol* 2012;**65**(6):679-85.
7. Foguet-Boreu Q, Violan C, Roso-Llorach A, et al. Impact of multimorbidity: acute morbidity, area of residency and use of health services across the life span in a region of south Europe. *BMC Fam Pract* 2014;**15**(1):55.
8. Machado VdSS, Valadares ALR, Costa-Paiva LH, et al. Aging, obesity, and multimorbidity in women 50 years or older: a population-based study. *Menopause* 2013;**20**(8):818-24.
9. Reza A, Rusk IS, Robab S. Aging in Iran: Past, Present and Future. *The Journal of Aging in Emerging Economies* 2013;**4**(1):17-34.
10. WHO- Country profile. Secondary WHO- Country profile 2013. <http://www.who.int/countries/irn/en/>.
11. Quiñones AR, Markwardt S, Botosaneanu A. Multimorbidity Combinations and Disability in Older Adults. *The Journals of Gerontology Series A: Biological Sciences and Medical Sciences* 2016;**71**(6):823-30.
12. Schäfer I, von Leitner E-C, Schön G, et al. Multimorbidity patterns in the elderly: a new approach of disease clustering identifies complex interrelations between chronic conditions. *PLoS One* 2010;**5**(12):e15941.
13. Abad-Díez JM, Calderón-Larrañaga A, Poncel-Falcó A, et al. Age and gender differences in the prevalence and patterns of multimorbidity in the older population. *BMC Geriatr* 2014;**14**(1):75.
14. Health topics: Women's health: World Health Organization.
15. Verdonk P, Klinge I. Mainstreaming sex and gender analysis in public health genomics. *Gend Med* 2012;**9**(6):402-10.
16. Goldman MB. *Women and Health*. 2 ed. China: Elsevier/Academic Press, 2013.

17. T. SR. An Overview of Women's Health: From the Past to the Future. *Epidemiology of Women's Health*: Jones & Bartlett Publishers, 2013:3-14.
18. Vlassoff C. Gender differences in determinants and consequences of health and illness. *J Health Popul Nutr* 2007;**25**(1):47-61.
19. Ahmadi B, Alimohammadian M, Yaseri M, et al. Multimorbidity: Epidemiology and Risk Factors in the Golestan Cohort Study, Iran: A Cross-Sectional Analysis. *Medicine* 2016;**95**(7):e2756.
20. Pourshams A, Khademi H, Malekshah AF, et al. Cohort profile: the Golestan Cohort Study—a prospective study of oesophageal cancer in northern Iran. *Int J Epidemiol* 2010;**39**(1):52-59.
21. Islami F, Kamangar F, Nasrollahzadeh D, et al. Socio-economic status and oesophageal cancer: results from a population-based case–control study in a high-risk area. *Int J Epidemiol* 2009;**38**(4):978-88.
22. Van Oostrom SH, Picavet HSJ, van Gelder BM, et al. Multimorbidity and comorbidity in the Dutch population—data from general practices. *BMC Public Health* 2012;**12**(1):715.
23. Barros AJ, Hirakata VN. Alternatives for logistic regression in cross-sectional studies: an empirical comparison of models that directly estimate the prevalence ratio. *BMC Med Res Methodol* 2003;**3**(1):1.
24. Eldridge SM, Ashby D, Kerry S. Sample size for cluster randomized trials: effect of coefficient of variation of cluster size and analysis method. *Int J Epidemiol* 2006;**35**(5):1292-300.
25. Hanley JA, Negassa A, Forrester JE. Statistical analysis of correlated data using generalized estimating equations: an orientation. *Am J Epidemiol* 2003;**157**(4):364-75.
26. Taylor AW, Price K, Gill TK, et al. Multimorbidity - not just an older person's issue. Results from an Australian biomedical study. *BMC Public Health* 2010;**10**:718.
27. Zielinski A, Halling A. Association between age, gender and multimorbidity level and receiving home health care: a population-based Swedish study. *BMC Res Notes* 2015;**8**(1):714.
28. Murtagh KN, Hubert HB. Gender differences in physical disability among an elderly cohort. *Am J Public Health* 2004;**94**(8):1406-11.
29. Autenrieth CS, Kirchberger I, Heier M, et al. Physical activity is inversely associated with multimorbidity in elderly men: results from the KORA-Age Augsburg Study. *Prev Med* 2013;**57**(1):17-19.
30. Bertakis KD, Azari R, Helms LJ, et al. Gender differences in the utilization of health care services. *J Fam Pract* 2000;**49**(2):147-47.
31. Chen FM, Fryer GE, Norris TE. Effects of comorbidity and clustering upon referrals in primary care. *The Journal of the American Board of Family Practice* 2005;**18**(6):449-52.
32. Forrest CB, Nutting PA, von Schrader S, et al. Primary care physician specialty referral decision making: patient, physician, and health care system determinants. *Med Decis Making* 2006;**26**(1):76-85.
33. Afshar S, Roderick P, Kowal P, et al. Multimorbidity and the inequalities of global ageing: a cross-sectional study of 28 countries using the World Health Surveys. *BMC Public Health* 2015;**15**(1):1-10.
34. Wang S, D'Arcy C, Yu Y, et al. Prevalence and patterns of multimorbidity in northeastern China: a cross-sectional study. *Public Health* 2015;**129**(11):1539-46.

- 1  
2  
3  
4  
5  
6  
7  
8  
9  
10  
11  
12  
13  
14  
15  
16  
17  
18  
19  
20  
21  
22  
23  
24  
25  
26  
27  
28  
29  
30  
31  
32  
33  
34  
35  
36  
37  
38  
39  
40  
41  
42  
43  
44  
45  
46  
47  
48  
49  
50  
51  
52  
53  
54  
55  
56  
57  
58  
59  
60
35. St John PD, Tyas SL, Menec V, et al. Multimorbidity, disability, and mortality in community-dwelling older adults. *Can Fam Physician* 2014;**60**(5):e272-e80.
  36. Wikström K, Lindström J, Harald K, et al. Clinical and lifestyle-related risk factors for incident multimorbidity: 10-year follow-up of Finnish population-based cohorts 1982–2012. *Eur J Intern Med* 2015;**26**(3):211-16.
  37. Kuo RN, Lai M-S. The influence of socio-economic status and multimorbidity patterns on healthcare costs: a six-year follow-up under a universal healthcare system. *Int J Equity Health* 2013;**12**(1):69.
  38. Wikström K, Lindström J, Tuomilehto J, et al. Socio-economic differences in dysglycemia and lifestyle-related risk factors in the Finnish middle-aged population. *The European Journal of Public Health* 2011;**21**(6):768-74.
  39. Khanam MA, Streatfield PK, Kabir ZN, et al. Prevalence and patterns of multimorbidity among elderly people in rural Bangladesh: a cross-sectional study. *J Health Popul Nutr* 2011;**29**(4):406.
  40. Leischik R, Foshag P, Strauß M, et al. Physical activity, cardiorespiratory fitness and carotid intima thickness: sedentary occupation as risk factor for atherosclerosis and obesity. *Eur Rev Med Pharmacol Sci* 2015;**19**(17):3157-68.
  41. Hudon C, Soubhi H, Fortin M. Relationship between multimorbidity and physical activity: secondary analysis from the Quebec health survey. *BMC Public Health* 2008;**8**(1):304.
  42. Pache B, Vollenweider P, Waeber G, et al. Prevalence of measured and reported multimorbidity in a representative sample of the Swiss population. *BMC Public Health* 2015;**15**(1):164.
  43. Farzadi F, Ahmadi B, Shariati B, et al. Women's health: Explaining the trend in gender ratio in Iran over half a century (1956–2006). *Public Health* 2010;**124**(2):86-89.
  44. Moghaddam AV, Damari B, Alikhani S, et al. Health in the 5th 5-years Development Plan of Iran: main challenges, general policies and strategies. *Iranian journal of public health* 2013;**42**(1):42.
  45. Rashidian A, Karimi-Shahanjarini A, Khosravi A, et al. Iran' Multiple Indicator Demographic and Health Survey (IrMIDHS-2010): Study protocol. *Int J Prev Med* 2014;**5**(5).
  46. Leischik R, Dworrak B, Strauss M, et al. Plasticity of Health. *German Journal of Medicine* 2016;**1**:1-17.
  47. Awofeso N. The Healthy Cities approach: Reflections on a framework for improving global health. *Bull World Health Organ* 2003;**81**(3):222-23.
  48. Healthy Cities. Secondary Healthy Cities. <http://www.euro.who.int/en/health-topics/environment-and-health/urban-health/activities/healthy-cities>.
  49. O'Neill M, Simard P. Choosing indicators to evaluate Healthy Cities projects: a political task? *Health Promotion International* 2006;**21**(2):145-52.
  50. Kickbusch I, Nutbeam D. Health promotion glossary. Geneva: World Health Organization 1998.

Supplementary Table 1: Chronic conditions by gender in population with Multimorbidity in the Golestan Cohort Study (GCS)

| Chronic Conditions | Total<br>(N=10,035) |      | Men<br>(N=2,836) |      | Women<br>(N=7,199) |      | Difference<br>(Men vs. women)<br>% |
|--------------------|---------------------|------|------------------|------|--------------------|------|------------------------------------|
|                    | Number              | %    | Number           | %    | Number             | %    |                                    |
| GERD               | 7690                | 76.6 | 2030             | 71.6 | 5660               | 78.6 | -7.1*                              |
| CVD                | 7379                | 73.5 | 1927             | 67.9 | 5452               | 75.7 | -7.8*                              |
| Diabetes           | 2535                | 25.3 | 686              | 24.2 | 1849               | 25.7 | -1.5                               |
| COPD               | 2203                | 22.0 | 653              | 23.0 | 1550               | 21.5 | 1.5                                |
| TB                 | 1030                | 10.3 | 293              | 10.3 | 737                | 10.2 | 0.1                                |
| Cancers            | 102                 | 1.0  | 34               | 1.2  | 68                 | 0.9  | 0.3                                |
| CKD                | 72                  | 0.7  | 27               | 1.0  | 45                 | 0.6  | 0.3                                |
| Liver diseases     | 28                  | 0.3  | 11               | 0.4  | 17                 | 0.2  | 0.2                                |

\* P-value <0.001

## STROBE Statement—checklist of items that should be included in reports of observational studies

|                              | Item No | Recommendation                                                                                                                                                                       | Page           |
|------------------------------|---------|--------------------------------------------------------------------------------------------------------------------------------------------------------------------------------------|----------------|
| <b>Title and abstract</b>    | 1       | (a) Indicate the study's design with a commonly used term in the title or the abstract                                                                                               | 1,2            |
|                              |         | (b) Provide in the abstract an informative and balanced summary of what was done and what was found                                                                                  | 2              |
| <b>Introduction</b>          |         |                                                                                                                                                                                      |                |
| Background/rationale         | 2       | Explain the scientific background and rationale for the investigation being reported                                                                                                 | 3              |
| Objectives                   | 3       | State specific objectives, including any pre-specified hypotheses                                                                                                                    | 3              |
| <b>Methods</b>               |         |                                                                                                                                                                                      |                |
| Study design                 | 4       | Present key elements of study design early in the paper                                                                                                                              | 3              |
| Setting                      | 5       | Describe the setting, locations, and relevant dates, including periods of recruitment, exposure, follow-up, and data collection                                                      | 3              |
|                              |         |                                                                                                                                                                                      | 4              |
| Participants                 | 6       | (a) <i>Cross-sectional study</i> —Give the eligibility criteria, and the sources and methods of selection of participants                                                            | 4              |
| Variables                    | 7       | Clearly define all outcomes, exposures, predictors, potential confounders, and effect modifiers. Give diagnostic criteria, if applicable                                             | 4              |
| Data sources/<br>measurement | 8*      | For each variable of interest, give sources of data and details of methods of assessment (measurement). Describe comparability of assessment methods if there is more than one group | 4              |
| Bias                         | 9       | Describe any efforts to address potential sources of bias                                                                                                                            | 3<br>(Ref. 19) |
| Study size                   | 10      | Explain how the study size was arrived at                                                                                                                                            | 3<br>(Ref. 19) |
| Quantitative variables       | 11      | Explain how quantitative variables were handled in the analyses. If applicable, describe which groupings were chosen and why                                                         | 4              |
| Statistical methods          | 12      | (a) Describe all statistical methods, including those used to control for confounding                                                                                                | 4              |
|                              |         | (b) Describe any methods used to examine subgroups and interactions                                                                                                                  | 4              |
|                              |         | (c) Explain how missing data were addressed                                                                                                                                          | 3<br>(Ref. 19) |
|                              |         | (d) <i>Cross-sectional study</i> —If applicable, describe analytical methods taking account of sampling strategy                                                                     | 3<br>(Ref. 19) |
|                              |         | (e) Describe any sensitivity analyses                                                                                                                                                | 3<br>(Ref. 19) |

Continued on next page

|                   |     |                                                                                                                                                                                                              |                                   |
|-------------------|-----|--------------------------------------------------------------------------------------------------------------------------------------------------------------------------------------------------------------|-----------------------------------|
| Results           |     |                                                                                                                                                                                                              |                                   |
| Participants      | 13* | (a) Report numbers of individuals at each stage of study—eg numbers potentially eligible, examined for eligibility, confirmed eligible, included in the study, completing follow-up, and analysed            | 3<br>(Ref. 19)                    |
|                   |     | (b) Give reasons for non-participation at each stage                                                                                                                                                         | 3<br>(Ref. 19)                    |
|                   |     | (c) Consider use of a flow diagram                                                                                                                                                                           | 3<br>(Ref. 19)                    |
| Descriptive data  | 14* | (a) Give characteristics of study participants (eg demographic, clinical, social) and information on exposures and potential confounders                                                                     | 3<br>(Ref. 19)<br>and<br>Table. 2 |
|                   |     | (b) Indicate number of participants with missing data for each variable of interest                                                                                                                          | N/A                               |
| Outcome data      | 15* | <i>Cross-sectional study</i> —Report numbers of outcome events or summary measures                                                                                                                           | 4                                 |
| Main results      | 16  | (a) Give unadjusted estimates and, if applicable, confounder-adjusted estimates and their precision (eg, 95% confidence interval). Make clear which confounders were adjusted for and why they were included | Table. 2                          |
|                   |     | (b) Report category boundaries when continuous variables were categorized                                                                                                                                    | N/A                               |
|                   |     | (c) If relevant, consider translating estimates of relative risk into absolute risk for a meaningful time period                                                                                             | N/A                               |
| Other analyses    | 17  | Report other analyses done—eg analyses of subgroups and interactions, and sensitivity analyses                                                                                                               | N/A                               |
| Discussion        |     |                                                                                                                                                                                                              |                                   |
| Key results       | 18  | Summarise key results with reference to study objectives                                                                                                                                                     | 5                                 |
| Limitations       | 19  | Discuss limitations of the study, taking into account sources of potential bias or imprecision. Discuss both direction and magnitude of any potential bias                                                   | 7                                 |
| Interpretation    | 20  | Give a cautious overall interpretation of results considering objectives, limitations, multiplicity of analyses, results from similar studies, and other relevant evidence                                   | 5                                 |
|                   |     |                                                                                                                                                                                                              | 6                                 |
|                   |     |                                                                                                                                                                                                              | 7                                 |
| Generalizability  | 21  | Discuss the generalisability (external validity) of the study results                                                                                                                                        | 7                                 |
|                   |     |                                                                                                                                                                                                              | 8                                 |
| Other information |     |                                                                                                                                                                                                              |                                   |
| Funding           | 22  | Give the source of funding and the role of the funders for the present study and, if applicable, for the original study on which the present article is based                                                | 8                                 |



# BMJ Open

## Multimorbidity as an Important Issue among Women: Results of Gender Difference Investigation in a Large Population-Based Cross-Sectional Study in West Asia

|                               |                                                                                                                                                                                                                                                                                                                                                                                                                                                                                                                                                                                                                                                                                                                                                                                                                                                                                                                                                                                                                                                                                                                                                                                                                                                                                                                                                                                                                                                                                                                                                                                                                                                                                                                                                                                                                                                                                                                                                                                                                                                                                                                                              |
|-------------------------------|----------------------------------------------------------------------------------------------------------------------------------------------------------------------------------------------------------------------------------------------------------------------------------------------------------------------------------------------------------------------------------------------------------------------------------------------------------------------------------------------------------------------------------------------------------------------------------------------------------------------------------------------------------------------------------------------------------------------------------------------------------------------------------------------------------------------------------------------------------------------------------------------------------------------------------------------------------------------------------------------------------------------------------------------------------------------------------------------------------------------------------------------------------------------------------------------------------------------------------------------------------------------------------------------------------------------------------------------------------------------------------------------------------------------------------------------------------------------------------------------------------------------------------------------------------------------------------------------------------------------------------------------------------------------------------------------------------------------------------------------------------------------------------------------------------------------------------------------------------------------------------------------------------------------------------------------------------------------------------------------------------------------------------------------------------------------------------------------------------------------------------------------|
| Journal:                      | <i>BMJ Open</i>                                                                                                                                                                                                                                                                                                                                                                                                                                                                                                                                                                                                                                                                                                                                                                                                                                                                                                                                                                                                                                                                                                                                                                                                                                                                                                                                                                                                                                                                                                                                                                                                                                                                                                                                                                                                                                                                                                                                                                                                                                                                                                                              |
| Manuscript ID                 | bmjopen-2016-013548.R2                                                                                                                                                                                                                                                                                                                                                                                                                                                                                                                                                                                                                                                                                                                                                                                                                                                                                                                                                                                                                                                                                                                                                                                                                                                                                                                                                                                                                                                                                                                                                                                                                                                                                                                                                                                                                                                                                                                                                                                                                                                                                                                       |
| Article Type:                 | Research                                                                                                                                                                                                                                                                                                                                                                                                                                                                                                                                                                                                                                                                                                                                                                                                                                                                                                                                                                                                                                                                                                                                                                                                                                                                                                                                                                                                                                                                                                                                                                                                                                                                                                                                                                                                                                                                                                                                                                                                                                                                                                                                     |
| Date Submitted by the Author: | 11-Feb-2017                                                                                                                                                                                                                                                                                                                                                                                                                                                                                                                                                                                                                                                                                                                                                                                                                                                                                                                                                                                                                                                                                                                                                                                                                                                                                                                                                                                                                                                                                                                                                                                                                                                                                                                                                                                                                                                                                                                                                                                                                                                                                                                                  |
| Complete List of Authors:     | <p>Alimohammadian, Masoomeh ; Tehran University of Medical Sciences, Department of Human Ecology, School of Public Health<br/>Majidi, Azam; Tehran University of Medical Sciences, Digestive Diseases Research Institute<br/>Yaseri, Mehdi; Tehran University of Medical Sciences, Department of Epidemiology and Biostatistics<br/>Ahmadi, Batoul; Tehran University of Medical Sciences, Department of Health Management and Economics, School of Public Health<br/>Islami, Farhad; Institute for Translational Epidemiology and Tisch Cancer Institute,, Icahn School of Medicine at Mount Sinai<br/>Derakhshan, Mohammad<br/>Delavari, Alireza; Tehran University of Medical Sciences, Digestive Diseases Research Institute<br/>Amani, Mohammad; Tehran University of Medical Sciences, Digestive Diseases Research Institute<br/>Feyz-Sani, Akbar; Tehran University of Medical Sciences, Digestive Diseases Research Institute<br/>Poustchi, Hossein; Tehran University of Medical Sciences, Digestive Diseases Research Institute<br/>Pourshams, Akram; Tehran University of Medical Sciences, Digestive Diseases Research Institute<br/>Sadjadi, Amir Mahdi<br/>Khoshnia, Masoud; Tehran University of Medical Sciences, Digestive Diseases Research Institute<br/>Qaravi, Samad; Tehran University of Medical Sciences, Digestive Diseases Research Institute<br/>Abnet, Christian; National Cancer Institute, Division of Cancer Epidemiology and Genetics<br/>Dawsey, Sanford; National Cancer Institute, NIH, Division of Cancer Epidemiology &amp; Genetics<br/>Brennan, Paul ; International Agency for Research on Cancer, Genetic Epidemiology Group<br/>Kamangar, Farin; Morgan State University, Department of Public Health Analysis, School of Community Health and Policy,<br/>Boffetta, Paolo; Institute for Translational Epidemiology and Tisch Cancer Institute, Icahn School of Medicine at Mount Sinai<br/>Sadjadi, Alireza; Tehran University of Medical Sciences, Digestive Diseases Research Institute<br/>Malekzadeh, Reza; Tehran University of Medical Sciences, Digestive Diseases Research Institute</p> |

1  
2  
3  
4  
5  
6  
7  
8  
9  
10  
11  
12  
13  
14  
15  
16  
17  
18  
19  
20  
21  
22  
23  
24  
25  
26  
27  
28  
29  
30  
31  
32  
33  
34  
35  
36  
37  
38  
39  
40  
41  
42  
43  
44  
45  
46  
47  
48  
49  
50  
51  
52  
53  
54  
55  
56  
57  
58  
59  
60

|                                 |                                                                 |
|---------------------------------|-----------------------------------------------------------------|
| <b>Primary Subject Heading</b>: | Public health                                                   |
| Secondary Subject Heading:      | Health policy                                                   |
| Keywords:                       | Multimorbidity, Gender differences, Golestan Cohort Study, Iran |
|                                 |                                                                 |

SCHOLARONE™  
Manuscripts

For peer review only

## Multimorbidity as an Important Issue among Women: Results of Gender Difference Investigation in a Large Population-Based Cross-Sectional Study in West Asia

Masoomeh Alimohammadian<sup>1,2,3∞</sup>, Azam Majidi<sup>1,2∞</sup>, Mehdi Yaseri<sup>4</sup>, Batoul Ahmadi<sup>5\*</sup>, Farhad Islami<sup>1,6</sup>, Mohammad H. Derakhshan<sup>2,7</sup>, Alireza Delavari<sup>1,2</sup>, Mohammad Amani<sup>1,2</sup>, Akabar Feyz Sani<sup>1,2</sup>, Hossein Poustchi<sup>1,2</sup>, Akram Pourshams<sup>1,2,8</sup>, Amir Mahdi Sadjadi<sup>1</sup>, Masoud Khoshnia<sup>2,9</sup>, Samad Qaravi<sup>2,9</sup>, Christian C. Abnet<sup>10</sup>, Sanford M. Dawsey<sup>10</sup>, Paul Brennan<sup>11</sup>, Farin Kamangar<sup>1,12</sup>, Paolo Boffetta<sup>6</sup>, Alireza Sadjadi<sup>1,2\*</sup>, Reza Malekzadeh<sup>1,2</sup>

1. Digestive Diseases Research Center, Digestive Diseases Research Institute, Tehran University of Medical Sciences, Tehran, Iran
2. Digestive Oncology Research Center, Digestive Diseases Research Institute, Tehran University of Medical Sciences, Tehran, Iran
3. Department of Human Ecology, School of Public Health, Tehran University of Medical Sciences, Tehran, Iran
4. Department of Epidemiology and Biostatistics, School of Public Health, Tehran University of Medical Sciences, Tehran, Iran
5. Department of Health Management and Economics, School of Public Health, Tehran University of Medical Sciences, Tehran, Iran
6. Surveillance and Health Service Research, American Cancer Society, Atlanta, USA
7. Division of Cardiovascular and Medical Sciences, Section of Gastroenterology, University of Glasgow, Glasgow, UK
8. Liver and Pancreatic Biliary Research Center, Digestive Diseases Research Institute, Tehran University of Medical Sciences, Tehran, Iran
9. Golestan Research Center of Gastroenterology and Hepatology, Golestan University of Medical Sciences, Gorgan, Iran
10. Division of Cancer Epidemiology and Genetics, National Cancer Institute, Bethesda, MD, USA
11. International Agency for Research on Cancer, Genetic Epidemiology Group, Lyon, France
12. Department of Public Health Analysis, School of Community Health and Policy, Morgan State University, Baltimore, MD, USA

<sup>∞</sup>These authors contributed equally to this work and share first authorship.

### \*Corresponding Authors:

Dr. Alireza Sadjadi: [sadjadia@gmail.com](mailto:sadjadia@gmail.com) and Dr. Batoul Ahmadi: [ahmadiba@tums.ac.ir](mailto:ahmadiba@tums.ac.ir)

**ABSTRACT:**

**Objectives:** This study investigated the impact of gender on multimorbidity in northern Iran.

**Design:** A cross-sectional analysis of the Golestan cohort data.

**Setting:** Golestan Province, Iran

**Study population:** 49946 residents (age: 40-75 years) of Golestan Province, Iran.

**Main outcome measures:** Researchers collected data related to multimorbidity, defined as co-existence of two or more chronic diseases in an individual, at the beginning of a representative cohort study which recruited its participants from 2004-2008. The researchers utilized simple and multiple Poisson regression models with robust variances to examine the simultaneous effects of multiple factors.

**Results:** Women had a 25.0% prevalence of multimorbidity, whereas men had a 13.4% prevalence ( $p<0.001$ ). Women of all age-groups had a higher prevalence of multimorbidity. Of note, multimorbidity began at a lower age (40-49 years) in women (17.3%) compared to men (8.6%) of the same age ( $p<0.001$ ). This study identified significant interactions between gender as well as socioeconomic status (SES), ethnicity, physical activity, marital status, education level, and smoking ( $p<0.01$ ).

**Conclusion:** Prevention and control of multimorbidity requires health promotion programs to increase public awareness about the modifiable risk factors, particularly among women.

**Strengths and limitations of this study:**

- A large, population-based cross-sectional study with detailed data on sociodemographic, lifestyle and behavioral risk factors provides a stronger insight to the analysis provided by this article.
- Trained, qualified medical researchers collected all of the data by interactive face-to-face interviews.
- Cross-sectional data analyses are susceptible to residual confounding and cannot determine the direction of an association.
- Another limitation of this investigation was the possible recall bias resulted from the method of gathering medical history (self-report).

**Keywords:** Multimorbidity, Gender differences, Golestan Cohort Study, Iran

**SUMMARY:**

### What is already known about this subject?

- Limited evidence exists about the relationship between multimorbidity and gender differences in developing countries.

### What does this study add?

- We conducted a cross-sectional analysis on the baseline data from the Golestan Cohort Study to address gender differences in multimorbidity in Iran as a developing country.
- Significant determinants of gender differences in multimorbidity included SES, educational status, ethnicity, physical activity, and smoking.

### How might this impact clinical practice? (Recommendations)

- The findings of this study confirm that multimorbidity is an important health issue, which requires gender-specific health interventions, particularly for the middle-aged population.

## INTRODUCTION:

Chronic diseases not only induce physical complications and social hardship for patients, but also develop remarkable burden for health systems. This issue can be further intensified by multimorbidity, the simultaneous occurrence of two or more chronic diseases in one person.<sup>1-3</sup>

Multimorbidity is associated with a higher mortality risk and increased utilization of healthcare services; therefore, it is a demanding situation for patients, their families, and healthcare providers.<sup>4-8</sup>

Despite the increase in life expectancy among developing countries over the last decades, the growing prevalence of multimorbidity has led to a decreased quality of life in patients with chronic diseases, especially in populations with limited resources.<sup>9,10</sup> Patients with multimorbidity require specific medical care; however, the current clinical practice lacks practical guidelines to manage and treat these patients.<sup>11-14</sup> Current clinical practices for patients with multiple chronic diseases routinely deal with each individual disease rather than multiple diseases, and can result in increased expenses for patients and healthcare systems, and possibly lead to unwanted adverse effects.<sup>13,15,16</sup>

Previous studies have shown a gender difference in patterns of multimorbidity. A systematic review of most previous studies indicated that women had a greater prevalence of multimorbidity compared to men.<sup>17</sup> This difference might be related to biological, sociocultural, environmental, or economic factors. As these factors vary globally, their associations with multimorbidity might differ across populations.<sup>18-22</sup> Therefore, more research should be conducted on this topic.

We used baseline data from the Golestan Cohort Study (GCS), a large-scale prospective study in Western Asia, to explore the epidemiology of multimorbidity.<sup>23</sup> In this article we used detailed statistical analyses to examine the variability of the prevalence and determinants of multimorbidity among different age groups. We also investigated interactions between gender and multiple sociodemographic and lifestyle factors potentially associated with multimorbidity.

## METHODS:

This cross-sectional study analyzed baseline data from the GCS. We analyzed data from 49946 Iranians, aged 40-75 years, who resided in Golestan Province in northeastern Iran. Participants had no current or previous diagnosis of any upper gastrointestinal cancers. The original cohort recruited its participants from 2004-2008.<sup>24</sup> The details of this study have been described elsewhere.<sup>23</sup>

1  
2  
3 Body mass index (BMI) was defined as underweight ( $<18.5 \text{ kg/m}^2$ ), normal ( $18.5\text{--}24.9 \text{ kg/m}^2$ ),  
4 overweight ( $25\text{--}29.9 \text{ kg/m}^2$ ), and obese ( $>30 \text{ kg/m}^2$ ). We divided participants into the following  
5 age clusters (age at the time of the interviews): 40-49, 50-60, and 61-75 years. In this mainly  
6 rural population, physical activity was defined based on occupational activity as follows:  
7 physically active (heavy or intense activity during employment) or physically inactive (all other  
8 participants). Participants' socioeconomic status (SES) comprised three levels (low, middle or  
9 high) according to the two-step cluster analysis<sup>25</sup> with the use of similarities for family assets,  
10 ethnicity, sex, employment status, age at onset of the first job, home ownership status and house  
11 size (surface area), and age.

12 Based on the possibility of gathering valid self-reported data during the feasibility phase of the  
13 GCS, we collected self-reported information for the following chronic diseases: cardiovascular  
14 disease (CVD), diabetes (types I and II), chronic obstructive pulmonary disease (COPD), chronic  
15 kidney disease (CKD), chronic liver disease, tuberculosis (TB), gastroesophageal reflux disease  
16 (GERD), and cancers.<sup>24</sup> Respondents reported the presence of regurgitation or heartburn during  
17 the past 1-2 years, via a standard GERD questionnaire.<sup>26,27</sup> Participants who reported any  
18 symptoms during the mentioned time period were considered to have GERD.

19 In this study, we defined multimorbidity as the simultaneous occurrence of two or more of the  
20 above mentioned chronic diseases (non-acute conditions)<sup>23</sup> in the same person.<sup>7,8,28</sup>

21 **Statistical analysis:** We estimated multimorbidity among participants according to several  
22 sociodemographic and lifestyle factors. The Student's t-test, Mann-Whitney, or chi-square tests  
23 evaluated differences in the distribution of respondents according to sociodemographic factors  
24 and lifestyle factors between men and women whenever appropriate.

25 Occasions exist in which the odds ratio can be misleading. Hence, we have used a model that  
26 could provide the prevalence ratio. Simple and multiple Poisson regressions were used with  
27 robust variances according to the method presented by Barros and Hirakata.<sup>29</sup> We sought to  
28 examine the possibility of a gender-based association between the studied factors and  
29 multimorbidity, calculated crude and adjusted prevalence ratios and test it with interaction (effect  
30 modification) test, and 95% confidence intervals. The gender differences between determinants  
31 of multimorbidity (i.e., interaction or effect modification) were evaluated in separate multiple  
32 Poisson regression models.

1  
2  
3 We have considered the design effects according to the generalized estimating equations (GEE)  
4 method for all analyses. This method is a generalization of the GLM that can handle the  
5 correlation of observation. The assumption of the GLM is the independence of observation  
6 which could be violated in studies that have intra-cluster correlations in cluster sampling or  
7 randomization, as well as in longitudinal analysis of repeated measurements obtained from a  
8 subject.<sup>30,31</sup> All statistical analyses were performed using SPSS software (IBM Corporation,  
9 released 2013, IBM SPSS Statistics for Windows, version 22.0; Armonk, NY, USA). Two-sided  
10 *p*-values less than 0.05 were considered statistically significant.  
11  
12  
13  
14  
15  
16  
17

## 18 **RESULTS:**

19  
20 This cross-sectional study enrolled 49946 participants (aged: 40-75 years) who predominantly  
21 resided in rural areas. Women comprised 28748 (57.6%) participants. The supplementary table  
22 shows the prevalence of self-reported chronic diseases in those with multimorbidity and the  
23 gender differences.  
24  
25  
26

27 The results indicated an overall age-sex standardized prevalence for multimorbidity of 19.4%  
28 (95% CI: 19.1% to 19.8%). Women had almost twice the prevalence (25.0%) compared to men  
29 (13.4%), with a difference of 11.7% (95% CI: 11.0% to 12.4%), (*p*<0.001). Table 1 shows the  
30 prevalence of multimorbidity in all study participants according to gender, sociodemographic  
31 and lifestyle factors. Women had evidence of more multimorbidity in all age-groups. Of note,  
32 compared to men, multimorbidity in women began at an earlier age (40-49 years). In this age  
33 group, 17.3% of women had multimorbidity compared to 8.6% for men (*p*<0.001).  
34  
35  
36  
37  
38  
39  
40  
41  
42  
43  
44  
45  
46  
47  
48  
49  
50  
51  
52  
53  
54  
55  
56  
57  
58  
59  
60



**Table 1: Prevalence of multimorbidity by gender according to sociodemographic and lifestyle factors**

| Variables                  | Levels                            | Total              |                       | Men                |                       | Women              |                       | Difference           | p-value |
|----------------------------|-----------------------------------|--------------------|-----------------------|--------------------|-----------------------|--------------------|-----------------------|----------------------|---------|
|                            |                                   | Overall<br>N=49946 | Multimorbidity<br>(%) | Overall<br>N=21198 | Multimorbidity<br>(%) | Overall<br>N=28748 | Multimorbidity<br>(%) | Men vs. Women<br>(%) |         |
| Age (years)                | 40-49                             | 23074              | 13.9                  | 9012               | 8.6                   | 14062              | 17.3                  | -8.7*                | <0.001  |
|                            | 50-60                             | 17512              | 22.7                  | 7321               | 14.2                  | 10191              | 28.8                  | -14.6*               | <0.001  |
|                            | 61-75                             | 9360               | 30.4                  | 4865               | 20.9                  | 4495               | 40.6                  | -19.7*               | <0.001  |
| Residential area           | Rural                             | 38354              | 20.2                  | 16514              | 13.3                  | 21840              | 25.4                  | -12.2*               | <0.001  |
|                            | Urban                             | 11592              | 19.8                  | 4684               | 13.8                  | 6908               | 23.9                  | -10.0*               | <0.001  |
| Ethnicity                  | Turkmen                           | 37253              | 19.6                  | 16051              | 12.6                  | 21202              | 24.9                  | -12.3*               | <0.001  |
|                            | Other <sup>1</sup>                | 12693              | 21.5                  | 5147               | 15.8                  | 7546               | 25.4                  | -9.5*                | <0.001  |
| Marital status             | Unmarried                         | 43873              | 18.6                  | 20634              | 13.4                  | 23239              | 23.3                  | -10.0*               | <0.001  |
|                            | Married                           | 6073               | 30.6                  | 564                | 14.2                  | 5509               | 32.3                  | -18.1*               | <0.001  |
| Education                  | Illiterate                        | 35060              | 23.4                  | 10406              | 15.6                  | 24654              | 26.7                  | -11.1*               | <0.001  |
|                            | ≤5 years                          | 8449               | 13.6                  | 5545               | 11.7                  | 2904               | 17.3                  | -5.5*                | <0.001  |
|                            | 6-12 years                        | 5376               | 10.9                  | 4317               | 10.8                  | 1059               | 11.1                  | -0.3                 | 0.761   |
|                            | University degree                 | 1061               | 9.9                   | 930                | 10.3                  | 131                | 6.9                   | 3.5                  | 0.219   |
| Employed                   | Yes                               | 43415              | 18.5                  | 17529              | 11.3                  | 25886              | 23.3                  | -12.0*               | <0.001  |
|                            | No                                | 6530               | 30.7                  | 3668               | 23.1                  | 2862               | 40.5                  | -17.4*               | <0.001  |
| Socioeconomic status (SES) | Good                              | 18831              | 18.1                  | 8703               | 12.7                  | 10128              | 22.7                  | -10.0*               | <0.001  |
|                            | Medium                            | 24001              | 20.5                  | 9748               | 13.3                  | 14253              | 25.4                  | -12.1*               | <0.001  |
|                            | Poor                              | 7105               | 24.1                  | 2741               | 15.9                  | 4364               | 29.2                  | -13.3*               | <0.001  |
| Physical activity          | Yes                               | 15838              | 13.3                  | 11308              | 10.2                  | 4530               | 20.8                  | -10.6*               | <0.001  |
|                            | No                                | 33947              | 23.2                  | 9852               | 17.0                  | 24095              | 25.8                  | -8.8*                | <0.001  |
| Body mass index (BMI)      | Underweight                       | 2380               | 17.4                  | 1245               | 14.1                  | 1135               | 21.0                  | -6.9*                | <0.001  |
|                            | Normal                            | 17871              | 14.9                  | 9596               | 11.3                  | 8275               | 19.2                  | -7.9*                | <0.001  |
|                            | Overweight                        | 16993              | 20.4                  | 7271               | 14.4                  | 9722               | 24.9                  | -10.6*               | <0.001  |
|                            | Obese                             | 12694              | 27.4                  | 3081               | 17.3                  | 9613               | 30.7                  | -13.3*               | <0.001  |
| Smoking <sup>2</sup>       | Never                             | 41323              | 21.1                  | 13018              | 12.8                  | 28305              | 24.9                  | -12.1*               | <0.001  |
|                            | Ex-smoker                         | 3189               | 21.2                  | 3064               | 20.3                  | 125                | 44.0                  | -23.7*               | <0.001  |
|                            | Light smoker (<20 cigarettes/day) | 3272               | 11.1                  | 3013               | 9.9                   | 259                | 25.5                  | -15.6*               | <0.001  |
|                            | Heavy smoker (≥20 cigarettes/day) | 2161               | 13.0                  | 2103               | 12.1                  | 58                 | 44.8                  | -32.7*               | <0.001  |
| Other tobacco use          | Yes (ever)                        | 4427               | 19.7                  | 3749               | 17.7                  | 678                | 30.8                  | -13.1*               | <0.001  |
|                            | No (never)                        | 45519              | 20.1                  | 17449              | 12.5                  | 28070              | 24.9                  | -12.4*               | <0.001  |
| Opium                      | Yes (ever)                        | 8489               | 19.6                  | 6138               | 11.7                  | 2351               | 24.0                  | -12.3*               | <0.001  |
|                            | No (never)                        | 41457              | 22.7                  | 15060              | 17.4                  | 26397              | 36.2                  | -18.8*               | <0.001  |
| Alcohol                    | Yes (ever)                        | 1721               | 20.2                  | 1701               | 13.0                  | 20                 | 25.0                  | -12.1*               | <0.001  |
|                            | No (never)                        | 48225              | 18.2                  | 19497              | 18.2                  | 28728              | 25.0                  | -6.8                 | 0.435   |

1. Other: Persian, Turk, Sistani, Baluch, and Kurdish; 2. Individuals were defined as smokers if they had used cigarettes at least once weekly for 6 months. \*  $p < 0.001$

1  
2  
3 Table 2 shows the results from multiple Poisson regression models. Men who were ex-smoker,  
4 non-Turkmen, married and physically inactive had significantly higher chance of multimorbidity.  
5  
6 Being in lower socioeconomic groups showed an association with multimorbidity only in  
7 women. Higher educational levels (compared to illiteracy) showed an inverse association with  
8 multimorbidity, mainly in women ( $p < 0.001$ ).  
9

10  
11 Based on interaction analysis, a significantly stronger association existed between poor/middle  
12 SES with multimorbidity in women compared to men ( $p = 0.033$ ). The associations between non-  
13 Turkmen ethnicity groups ( $p = 0.003$ ), married status ( $p = 0.041$ ), physical inactivity ( $p = 0.009$ ),  
14 and ex-smoking ( $p = 0.033$ ) and the prevalence of multimorbidity was statistically significant in  
15 men only, or stronger in men compared to women. There was an inverse association between  
16 education and multimorbidity mainly in women ( $p$  for interaction  $< 0.001$ ).  
17  
18  
19  
20  
21  
22  
23  
24  
25  
26  
27  
28  
29  
30  
31  
32  
33  
34  
35  
36  
37  
38  
39  
40  
41  
42  
43  
44  
45  
46  
47  
48  
49  
50  
51  
52  
53  
54  
55  
56  
57  
58  
59  
60

**Table 2: Crude and adjusted prevalence ratio (PR) based on simple and multiple Poisson regression.**

| Variables                  | Levels                                      | Men   |               |                       |               | Women |               |                       |               | Interaction <sup>3</sup><br><i>p-value</i> |
|----------------------------|---------------------------------------------|-------|---------------|-----------------------|---------------|-------|---------------|-----------------------|---------------|--------------------------------------------|
|                            |                                             | Crude |               | Adjusted <sup>2</sup> |               | Crude |               | Adjusted <sup>2</sup> |               |                                            |
|                            |                                             | PR    | 95% CI        | PR                    | 95% CI        | PR    | 95% CI        | PR                    | 95% CI        |                                            |
| Age (years)                | 40-49                                       | Ref.  |               | Ref.                  |               | Ref.  |               | Ref.                  |               | 0.282                                      |
|                            | 50-60                                       | 1.64  | (1.50-1.80)** | 1.46                  | (1.32-1.61)** | 1.66  | (1.58-1.76)** | 1.51                  | (1.43-1.60)** |                                            |
|                            | 61-75                                       | 2.42  | (2.20-2.65)** | 1.87                  | (1.67-2.10)** | 2.34  | (2.20-2.49)** | 2.06                  | (1.92-2.21)** |                                            |
| Residential area           | Rural                                       | Ref.  |               | Ref.                  |               | Ref.  |               | Ref.                  |               | 0.280                                      |
|                            | Urban                                       | 1.04  | (0.95-1.14)   | 0.93                  | (0.84-1.03)   | 0.94  | (0.89-0.99)*  | 0.98                  | (0.92-1.05)   |                                            |
| Ethnicity                  | Turkmen                                     | Ref.  |               | Ref.                  |               | Ref.  |               | Ref.                  |               | 0.003                                      |
|                            | Other <sup>1</sup>                          | 1.26  | (1.16-1.36)** | 1.24                  | (1.14-1.35)** | 1.02  | (0.97-1.07)   | 1.09                  | (1.03-1.15)*  |                                            |
| Marital status             | Unmarried                                   | Ref.  |               | Ref.                  |               | Ref.  |               | Ref.                  |               | 0.042                                      |
|                            | Married                                     | 0.94  | (0.75-1.18)   | 1.22                  | (0.97-1.54)   | 0.72  | (0.68-0.76)** | 0.98                  | (0.92-1.04)   |                                            |
| Education                  | Illiterate                                  | Ref.  |               | Ref.                  |               | Ref.  |               | Ref.                  |               | 0.000                                      |
|                            | ≤5 years                                    | 0.75  | (0.69-0.82)** | 0.91                  | (0.82-1.00)   | 0.65  | (0.59-0.71)** | 0.81                  | (0.73-0.89)** |                                            |
|                            | 6-12 years                                  | 0.69  | (0.63-0.77)** | 0.91                  | (0.80-1.03)   | 0.42  | (0.35-0.50)** | 0.57                  | (0.47-0.69)** |                                            |
|                            | University degree                           | 0.66  | (0.54-0.81)** | 0.90                  | (0.72-1.13)   | 0.26  | (0.13-0.50)** | 0.37                  | (0.19-0.72)*  |                                            |
| Employed                   | Yes                                         | Ref.  |               | Ref.                  |               | Ref.  |               | Ref.                  |               | 0.225                                      |
|                            | No                                          | 2.04  | (1.88-2.21)** | 1.35                  | (1.23-1.48)** | 1.74  | (1.63-1.85)** | 1.27                  | (1.18-1.35)** |                                            |
| Socioeconomic status (SES) | Good                                        | Ref.  |               | Ref.                  |               | Ref.  |               | Ref.                  |               | 0.033                                      |
|                            | Medium                                      | 1.05  | (0.97-1.14)   | 0.95                  | (0.86-1.05)   | 1.12  | (1.06-1.18)** | 1.08                  | (1.02-1.14)*  |                                            |
|                            | Poor                                        | 1.26  | (1.12-1.40)** | 1.04                  | (0.91-1.18)   | 1.28  | (1.20-1.38)** | 1.11                  | (1.03-1.19)*  |                                            |
| Physical activity          | Yes                                         | Ref.  |               | Ref.                  |               | Ref.  |               | Ref.                  |               | 0.009                                      |
|                            | No                                          | 1.66  | (1.54-1.79)** | 1.28                  | (1.18-1.39)** | 1.24  | (1.16-1.33)** | 1.12                  | (1.04-1.21)*  |                                            |
| Body mass index (BMI)      | Normal                                      | Ref.  |               | Ref.                  |               | Ref.  |               | Ref.                  |               | 0.594                                      |
|                            | Underweight                                 | 1.25  | (1.06-1.46)   | 1.04                  | (0.89-1.22)   | 1.09  | (0.95-1.25)   | 0.93                  | (0.81-1.07)   |                                            |
|                            | Overweight                                  | 1.28  | (1.17-1.39)** | 1.46                  | (1.34-1.60)** | 1.30  | (1.22-1.38)** | 1.43                  | (1.34-1.52)** |                                            |
|                            | Obese                                       | 1.54  | (1.39-1.71)** | 1.85                  | (1.66-2.06)** | 1.60  | (1.50-1.70)** | 1.87                  | (1.75-1.99)** |                                            |
| Smoking                    | Never                                       | Ref.  |               | Ref.                  |               | Ref.  |               | Ref.                  |               | 0.033                                      |
|                            | Ex-smoker                                   | 1.59  | (1.45-1.74)** | 1.25                  | (1.13-1.39)** | 1.77  | (1.35-2.30)** | 1.22                  | (0.93-1.59)   |                                            |
|                            | Light smoker<br>( $<20$ cigarettes/day)     | 0.77  | (0.68-0.88)** | 0.78                  | (0.69-0.89)** | 1.02  | (0.80-1.30)   | 0.89                  | (0.70-1.14)   |                                            |
|                            | Heavy smoker<br>( $\geq 20$ cigarettes/day) | 0.95  | (0.83-1.08)   | 0.87                  | (0.76-1.00)   | 1.80  | (1.22-2.64)** | 1.33                  | (0.90-1.96)   |                                            |
| Other tobacco use          | No (never)                                  | Ref.  |               | Ref.                  |               | Ref.  |               | Ref.                  |               | 0.945                                      |
|                            | Yes (ever)                                  | 1.42  | (1.30-1.55)** | 0.99                  | (0.89-1.09)   | 1.24  | (1.08-1.42)*  | 0.98                  | (0.85-1.13)   |                                            |
| Opium                      | No (never)                                  | Ref.  |               | Ref.                  |               | Ref.  |               | Ref.                  |               | 0.558                                      |
|                            | Yes (ever)                                  | 1.49  | (1.38-1.61)** | 1.50                  | (1.37-1.64)** | 1.51  | (1.40-1.62)** | 1.45                  | (1.35-1.57)** |                                            |
| Alcohol                    | No (never)                                  | Ref.  |               | Ref.                  |               | Ref.  |               | Ref.                  |               | 0.401                                      |
|                            | Yes (ever)                                  | 1.40  | (1.25-1.58)** | 1.31                  | (1.15-1.49)** | 1.00  | (0.42-2.40)   | 0.94                  | (0.39-2.25)   |                                            |

1. Other: Persian, Turk, Sistani, Baluch, and Kurdish; 2. Prevalence ratios were adjusted for baseline variables; 3. Difference between sexes (*p*-value for interaction refers to the Wald test),

\*:  $p < 0.01$ ; \*\*:  $p < 0.001$

**DISCUSSION:**

This study examined gender-related determinants of multimorbidity in a cross-sectional analysis of a large cohort study that had more than 49000 participants. Women of all ages had a higher overall prevalence of multimorbidity. Multimorbidity was not only prevalent in elderly people; it also affected participants aged 40-49 years. Gender interacted with sociodemographic factors of ethnicity, marital status, educational level, SES, physical activity, and smoking in terms of multimorbidity prevalence. Past smoking history, non-Turkmen ethnic groups, married status, and physical inactivity showed significant associations with multimorbidity in men. Lower socioeconomic groups were associated with multimorbidity, only in women.

Despite current perceptions, this study revealed that multimorbidity was not confined to elderly people. The results showed that middle-age cohort participants (age <50) of both genders also suffered from this condition, and this observation has been supported by another study.<sup>32</sup> We observed that women had a greater burden of multimorbidity which supported the results from a study by Zielinski et al. on a Swedish population.<sup>33</sup> A potential cause for more significant prevalence of multimorbidity among women could be their relatively higher tendency to share their conditions in self-reports.<sup>34,35</sup> There is evidence that women use more health care facilities, particularly public funded health care compared to men.<sup>36-38</sup> Possible influences for this excess multimorbidity in women could be higher exposure to common risk factors for chronic diseases or gender inequality in access to healthcare.<sup>7,8,39-42</sup> It is worth mentioning that this information is related to data collected approximately ten years ago at a subnational level.

This study showed a significant association between low SES and multimorbidity among women. Earlier studies suggested an association between low SES and multimorbidity.<sup>43,44</sup> This might partially be explained by differences in lifestyle attributed to SES. Low SES might reduce care-seeking in patients with chronic diseases.<sup>43</sup> This might produce a paradox, as lower health care use might translate to lower documented morbidity. This study's findings indicated that low and middle SES had an association with multimorbidity in women, which has supported the assertion that women are at higher risk for the adverse effects of poverty, payment inequality, and health disparities.<sup>45</sup> Khanam et al. concluded that gender differences in SES, living and working environments, lifestyle factors, and life-events might affect the occurrence and outcome of multimorbidity among women.<sup>46</sup>

A previous study revealed that inactivity might increase the risk of breast and colorectal cancers, diabetes mellitus, and ischemic heart diseases.<sup>47</sup> Autenrieth et al. discovered an inverse

1  
2  
3 association between physical activity and multimorbidity among men.<sup>35</sup> Another study reported  
4 no association between multimorbidity and physical activity for either men or women.<sup>48</sup> We  
5 observed an association between sedentary occupations that involved decreased physical activity  
6 and multimorbidity, which was more evident in men. This might be due to the proportionately  
7 longer hours that men spend at sedentary occupations.

8  
9  
10 In this study the prevalence ratio of multimorbidity significantly decreased with increased  
11 education level; the association was more obvious in women. Similarly, other studies showed a  
12 decreased likelihood of multimorbidity among better-educated populations.<sup>39,42,49</sup>

13  
14  
15 The GCS enrolled participants above 40 years of age whose cultural, educational and social basis  
16 was shaped around the 1970s – a time of limited access to primary healthcare (PHC) facilities,  
17 particularly in rural areas.<sup>50</sup> However, after the 1980s, there was a substantial improvement in  
18 health, life expectancy, control of communicable diseases, and SES in Iran.<sup>25,50</sup> Iran was among  
19 the few countries that reached WHO defined millennium development goals prior to 2015.<sup>51</sup> We  
20 observed that education was defined as a protective factor for multimorbidity. In this population,  
21 women had a literacy rate of less than 20%.<sup>24</sup> The latest report, released in 2014, has shown  
22 tremendous increase in women's literacy in Golestan Province, which is over 80%.<sup>52</sup> The  
23 improvements in health, education, and other SES have decreased health inequalities which may  
24 influence disease patterns, including multimorbidity, in succeeding generations.

25  
26  
27 Access to affordable health services, as a human right, is a necessity for improved quality of life.  
28 Despite the considerable progress in community health in recent decades, there is an increasing  
29 prevalence of chronic diseases.<sup>53</sup> Some global movements related to healthy lifestyles have  
30 underlined the need for multi-dimensionality collaborations for health promotion as stated in the  
31 Ottawa Charter.<sup>53-57</sup> The findings of this study and recommendations by WHO<sup>53</sup> indicate that  
32 specific national and sub-national health policies for men and women of different age-groups and  
33 SES should be implemented.

34  
35  
36 The possible changes in demographic characteristics and lifestyle habits of the Iranian population  
37 over the past decades and the current study sampling methods (regional vs. national) should be  
38 taken into consideration. Future studies that assess more representative samples or at the national  
39 level are recommended.

## 40 41 42 43 44 45 46 47 48 49 50 51 52 53 54 55 **CONCLUSION**

1  
2  
3 The findings of this study confirm that multimorbidity is an important health issue for all  
4 individuals above 40 years of age, with particular emphasis for women with lower SES and  
5 educational levels. Men with decreased physical activity, married, and former smokers have  
6 shown a higher risk for multimorbidity.  
7  
8

9  
10 Defining priority interventions and multi-sectorial policies that tackle multimorbidity in both  
11 men and women, as well as increased attention to middle-aged populations are required. In order  
12 to control multimorbidity, particularly in women, we recommend the use of health promotion  
13 and educational methods to enhance public awareness about modifiable risk factors such as  
14 physical activity and smoking.  
15  
16  
17  
18

19  
20 **Acknowledgments:** We wish to thank the study participants for their cooperation over a number  
21 of years and the primary health care workers (Behvarz) employed in the study areas for their help.  
22  
23

24  
25 **Ethics approval:** The Ethics Committee of the Digestive Diseases Research Institute, Tehran  
26 University of Medical Sciences approved this study (OHRP-IRB-00001641).  
27  
28

29  
30 **Contributorship statement:** MY analyzed the data. MA, AM and AMS drafted the manuscript.  
31 AS, AM, MA, MA, MK, and MHD provided scientific input. RM, FK, HP, AD, and SQ  
32 provided expert clinical advice and data interpretation. PB, FK, RM, BA, AP, FI, PB, and SMD  
33 provided expert guidance on health policy and delivery of healthcare and interpretation of the  
34 data. AS, MA, AM, and FI were involved as methodologists in research interpretation and  
35 manuscript writing. All authors made critical revisions and provided intellectual content to the  
36 manuscript, approved the final version to be published, and agreed to be accountable for all  
37 aspects of this work. AS and BA are the guarantors for this study.  
38  
39  
40  
41  
42  
43

44  
45 **Competing interests:** None of the authors has any conflicts of interest to declare.  
46

47  
48 **Funding:** This study was supported by the Digestive Disease Research Institute at Tehran  
49 University of Medical Sciences (grant no: 82–603).  
50

51  
52 **Data sharing statement:** No additional data is available.  
53  
54  
55  
56  
57  
58  
59  
60

## References:

1. Loza E, Jover JA, Rodriguez L, Carmona L, Group ES. Multimorbidity: prevalence, effect on quality of life and daily functioning, and variation of this effect when one condition is a rheumatic disease. Paper presented at: Seminars in arthritis and rheumatism2009.
2. Van den Akker M, Buntinx F, Metsemakers JF, Roos S, Knottnerus JA. Multimorbidity in general practice: prevalence, incidence, and determinants of co-occurring chronic and recurrent diseases. *J. Clin. Epidemiol.* 1998;51(5):367-375.
3. Violán C, Foguet-Boreu Q, Roso-Llorach A, et al. Burden of multimorbidity, socioeconomic status and use of health services across stages of life in urban areas: a cross-sectional study. *BMC Public Health.* 2014;14(1):530.
4. Alaba O, Chola L. The social determinants of multimorbidity in South Africa. *Int J Equity Health.* 2013;12:63.
5. Barnett K, Mercer SW, Norbury M, Watt G, Wyke S, Guthrie B. Epidemiology of multimorbidity and implications for health care, research, and medical education: a cross-sectional study. *The Lancet.* 2012;380(9836):37-43.
6. Diederichs CP, Wellmann J, Bartels DB, Ellert U, Hoffmann W, Berger K. How to weight chronic diseases in multimorbidity indices? Development of a new method on the basis of individual data from five population-based studies. *J. Clin. Epidemiol.* 2012;65(6):679-685.
7. Foguet-Boreu Q, Violan C, Roso-Llorach A, et al. Impact of multimorbidity: acute morbidity, area of residency and use of health services across the life span in a region of south Europe. *BMC Fam. Pract.* 2014;15(1):55.
8. Machado VdSS, Valadares ALR, Costa-Paiva LH, Osis MJ, Sousa MH, Pinto-Neto AM. Aging, obesity, and multimorbidity in women 50 years or older: a population-based study. *Menopause.* 2013;20(8):818-824.
9. Reza A, Rusk IS, Robab S. Aging in Iran: Past, Present and Future. *The Journal of Aging in Emerging Economies.* 2013;4(1):17-34.
10. WHO- Country profile. *Iran (Islamic Republic of) 2013*; <http://www.who.int/countries/irn/en/>. Accessed Access Date: 29 Dec 2015, 2015.
11. Quiñones AR, Markwardt S, Botosaneanu A. Multimorbidity Combinations and Disability in Older Adults. *The Journals of Gerontology Series A: Biological Sciences and Medical Sciences.* 2016;71(6):823-830.
12. Boyd CM, Fortin M. Future of multimorbidity research: how should understanding of multimorbidity inform health system design. *Public Health Rev.* 2010;32(2):451-474.
13. Guthrie B, Payne K, Alderson P, McMurdo ME, Mercer SW. Adapting clinical guidelines to take account of multimorbidity. *Br. Med. J.* 2012;345(oct04):e6341-e6341.
14. Hughes LD, McMurdo ME, Guthrie B. Guidelines for people not for diseases: the challenges of applying UK clinical guidelines to people with multimorbidity. *Age Ageing.* 2013;42(1):62-69.
15. Schäfer I, von Leitner E-C, Schön G, et al. Multimorbidity patterns in the elderly: a new approach of disease clustering identifies complex interrelations between chronic conditions. *PLoS One.* 2010;5(12):e15941.

16. Uhlig K, Leff B, Kent D, et al. A framework for crafting clinical practice guidelines that are relevant to the care and management of people with multimorbidity. *J. Gen. Intern. Med.* 2014;29(4):670-679.
17. Violan C, Foguet-Boreu Q, Flores-Mateo G, et al. Prevalence, determinants and patterns of multimorbidity in primary care: a systematic review of observational studies. *PLoS One.* 2014;9(7):e102149.
18. Health topics: Women's health. Vol 2015: World Health Organization.
19. Verdonk P, Klinge I. Mainstreaming sex and gender analysis in public health genomics. *Gend. Med.* 2012;9(6):402-410.
20. Goldman MB. *Women and Health*. 2 ed. China: Elsevier/Academic Press; 2013.
21. T. SR. An Overview of Women's Health: From the Past to the Future. *Epidemiology of Women's Health*: Jones & Bartlett Publishers; 2013:3-14.
22. Vlassoff C. Gender differences in determinants and consequences of health and illness. *J Health Popul Nutr.* 2007;25(1):47-61.
23. Ahmadi B, Alimohammadian M, Yaseri M, et al. Multimorbidity: Epidemiology and Risk Factors in the Golestan Cohort Study, Iran: A Cross-Sectional Analysis. *Medicine.* 2016;95(7):e2756.
24. Pourshams A, Khademi H, Malekshah AF, et al. Cohort profile: the Golestan Cohort Study—a prospective study of oesophageal cancer in northern Iran. *Int. J. Epidemiol.* 2010;39(1):52-59.
25. Islami F, Kamangar F, Nasrollahzadeh D, et al. Socio-economic status and oesophageal cancer: results from a population-based case–control study in a high-risk area. *Int. J. Epidemiol.* 2009;38(4):978-988.
26. Shaw MJ, Talley NJ, Beebe TJ, et al. Initial validation of a diagnostic questionnaire for gastroesophageal reflux disease. *Am. J. Gastroenterol.* Jan 2001;96(1):52-57.
27. Islami F, Nasserri-Moghaddam S, Pourshams A, et al. Determinants of Gastroesophageal Reflux Disease, Including Hookah Smoking and Opium Use—A Cross-Sectional Analysis of 50,000 Individuals. *PLoS One.* 2014;9(2):e89256.
28. Van Oostrom SH, Picavet HSJ, van Gelder BM, et al. Multimorbidity and comorbidity in the Dutch population—data from general practices. *BMC Public Health.* 2012;12(1):715.
29. Barros AJ, Hirakata VN. Alternatives for logistic regression in cross-sectional studies: an empirical comparison of models that directly estimate the prevalence ratio. *BMC Med. Res. Methodol.* 2003;3(1):1.
30. Eldridge SM, Ashby D, Kerry S. Sample size for cluster randomized trials: effect of coefficient of variation of cluster size and analysis method. *Int. J. Epidemiol.* 2006;35(5):1292-1300.
31. Hanley JA, Negassa A, Forrester JE. Statistical analysis of correlated data using generalized estimating equations: an orientation. *Am. J. Epidemiol.* 2003;157(4):364-375.
32. Taylor AW, Price K, Gill TK, et al. Multimorbidity - not just an older person's issue. Results from an Australian biomedical study. *BMC Public Health.* 2010;10:718.
33. Zielinski A, Halling A. Association between age, gender and multimorbidity level and receiving home health care: a population-based Swedish study. *BMC Res. Notes.* 2015;8(1):714.



- 1  
2  
3 34. Murtagh KN, Hubert HB. Gender differences in physical disability among an elderly  
4 cohort. *Am. J. Public Health.* 2004;94(8):1406-1411.
- 5 35. Autenrieth CS, Kirchberger I, Heier M, et al. Physical activity is inversely associated with  
6 multimorbidity in elderly men: results from the KORA-Age Augsburg Study. *Prev. Med.*  
7 2013;57(1):17-19.
- 8 36. Chen FM, Fryer GE, Norris TE. Effects of comorbidity and clustering upon referrals in  
9 primary care. *The Journal of the American Board of Family Practice.* 2005;18(6):449-452.
- 10 37. Forrest CB, Nutting PA, von Schrader S, Rohde C, Starfield B. Primary care physician  
11 specialty referral decision making: patient, physician, and health care system  
12 determinants. *Med. Decis. Making.* 2006;26(1):76-85.
- 13 38. Bertakis KD, Azari R, Helms LJ, Callahan EJ, Robbins JA. Gender differences in the  
14 utilization of health care services. *J. Fam. Pract.* 2000;49(2):147-147.
- 15 39. Afshar S, Roderick P, Kowal P, Dimitrov B, Hill A. Multimorbidity and the inequalities of  
16 global ageing: a cross-sectional study of 28 countries using the World Health Surveys.  
17 *BMC Public Health.* 2015/08/13 2015;15(1):1-10.
- 18 40. Abad-Díez JM, Calderón-Larrañaga A, Poncel-Falcó A, et al. Age and gender differences  
19 in the prevalence and patterns of multimorbidity in the older population. *BMC Geriatr.*  
20 2014;14(1):75.
- 21 41. Wang S, D'Arcy C, Yu Y, et al. Prevalence and patterns of multimorbidity in northeastern  
22 China: a cross-sectional study. *Public Health.* 2015;129(11):1539-1546.
- 23 42. St John PD, Tyas SL, Menec V, Tate R. Multimorbidity, disability, and mortality in  
24 community-dwelling older adults. *Can. Fam. Physician.* 2014;60(5):e272-e280.
- 25 43. Wikström K, Lindström J, Harald K, Peltonen M, Laatikainen T. Clinical and lifestyle-  
26 related risk factors for incident multimorbidity: 10-year follow-up of Finnish population-  
27 based cohorts 1982–2012. *Eur. J. Intern. Med.* 2015;26(3):211-216.
- 28 44. Kuo RN, Lai M-S. The influence of socio-economic status and multimorbidity patterns on  
29 healthcare costs: a six-year follow-up under a universal healthcare system. *Int J Equity*  
30 *Health.* 2013;12(1):69.
- 31 45. Wikström K, Lindström J, Tuomilehto J, et al. Socio-economic differences in dysglycemia  
32 and lifestyle-related risk factors in the Finnish middle-aged population. *The European*  
33 *Journal of Public Health.* 2011;21(6):768-774.
- 34 46. Khanam MA, Streatfield PK, Kabir ZN, Qiu C, Cornelius C, Wahlin Å. Prevalence and  
35 patterns of multimorbidity among elderly people in rural Bangladesh: a cross-sectional  
36 study. *J Health Popul Nutr.* 2011;29(4):406.
- 37 47. Leischik R, Foshag P, Strauß M, et al. Physical activity, cardiorespiratory fitness and  
38 carotid intima thickness: sedentary occupation as risk factor for atherosclerosis and  
39 obesity. *Eur. Rev. Med. Pharmacol. Sci.* 2015;19(17):3157-3168.
- 40 48. Hudon C, Soubhi H, Fortin M. Relationship between multimorbidity and physical activity:  
41 secondary analysis from the Quebec health survey. *BMC Public Health.* 2008;8(1):304.
- 42 49. Pache B, Vollenweider P, Waeber G, Marques-Vidal P. Prevalence of measured and  
43 reported multimorbidity in a representative sample of the Swiss population. *BMC Public*  
44 *Health.* 2015;15(1):164.
- 45 50. Farzadi F, Ahmadi B, Shariati B, Alimohamadian M, Mohamad K. Women's health:  
46 Explaining the trend in gender ratio in Iran over half a century (1956–2006). *Public*  
47 *Health.* 2010;124(2):86-89.
- 48  
49  
50  
51  
52  
53  
54  
55  
56  
57  
58  
59  
60

- 1  
2  
3 51. Moghaddam AV, Damari B, Alikhani S, et al. Health in the 5th 5-years Development Plan  
4 of Iran: main challenges, general policies and strategies. *Iranian journal of public health*.  
5 2013;42(1):42.  
6  
7 52. Rashidian A, Karimi-Shahanjarini A, Khosravi A, et al. Iran'Multiple Indicator  
8 Demographic and Health Survey (IrMIDHS-2010): Study protocol. *Int. J. Prev. Med*.  
9 2014;5(5).  
10  
11 53. Leischik R, Dworak B, Strauss M, et al. Plasticity of Health. *German Journal of Medicine*.  
12 2016;1:1-17.  
13  
14 54. Awofeso N. The Healthy Cities approach: Reflections on a framework for improving  
15 global health. *Bull. World Health Organ*. 2003;81(3):222-223.  
16  
17 55. Healthy Cities. [http://www.euro.who.int/en/health-topics/environment-and-](http://www.euro.who.int/en/health-topics/environment-and-health/urban-health/activities/healthy-cities)  
18 [health/urban-health/activities/healthy-cities](http://www.euro.who.int/en/health-topics/environment-and-health/urban-health/activities/healthy-cities). Accessed Access Date: 20 March 2016,  
19 2016.  
20  
21 56. O'Neill M, Simard P. Choosing indicators to evaluate Healthy Cities projects: a political  
22 task? *Health Promotion International*. 2006;21(2):145-152.  
23  
24 57. Kickbusch I, Nutbeam D. Health promotion glossary. *Geneva: World Health*  
25 *Organization*. 1998.  
26  
27  
28  
29  
30  
31  
32  
33  
34  
35  
36  
37  
38  
39  
40  
41  
42  
43  
44  
45  
46  
47  
48  
49  
50  
51  
52  
53  
54  
55  
56  
57  
58  
59  
60

Supplementary Table 1: Chronic conditions by gender in population with Multimorbidity in the Golestan Cohort Study (GCS)

| Chronic Conditions | Total<br>(N=10,035) |      | Men<br>(N=2,836) |      | Women<br>(N=7,199) |      | Difference<br>(Men vs. women) |
|--------------------|---------------------|------|------------------|------|--------------------|------|-------------------------------|
|                    | Number              | %    | Number           | %    | Number             | %    | %                             |
| GERD               | 7690                | 76.6 | 2030             | 71.6 | 5660               | 78.6 | -7.1*                         |
| CVD                | 7379                | 73.5 | 1927             | 67.9 | 5452               | 75.7 | -7.8*                         |
| Diabetes           | 2535                | 25.3 | 686              | 24.2 | 1849               | 25.7 | -1.5                          |
| COPD               | 2203                | 22.0 | 653              | 23.0 | 1550               | 21.5 | 1.5                           |
| TB                 | 1030                | 10.3 | 293              | 10.3 | 737                | 10.2 | 0.1                           |
| Cancers            | 102                 | 1.0  | 34               | 1.2  | 68                 | 0.9  | 0.3                           |
| CKD                | 72                  | 0.7  | 27               | 1.0  | 45                 | 0.6  | 0.3                           |
| Liver diseases     | 28                  | 0.3  | 11               | 0.4  | 17                 | 0.2  | 0.2                           |

\* P-value <0.001

## STROBE Statement—checklist of items that should be included in reports of observational studies

|                              | Item No | Recommendation                                                                                                                                                                       | Page           |
|------------------------------|---------|--------------------------------------------------------------------------------------------------------------------------------------------------------------------------------------|----------------|
| <b>Title and abstract</b>    | 1       | (a) Indicate the study's design with a commonly used term in the title or the abstract                                                                                               | 1,2            |
|                              |         | (b) Provide in the abstract an informative and balanced summary of what was done and what was found                                                                                  | 2              |
| <b>Introduction</b>          |         |                                                                                                                                                                                      |                |
| Background/rationale         | 2       | Explain the scientific background and rationale for the investigation being reported                                                                                                 | 3              |
| Objectives                   | 3       | State specific objectives, including any pre-specified hypotheses                                                                                                                    | 3              |
| <b>Methods</b>               |         |                                                                                                                                                                                      |                |
| Study design                 | 4       | Present key elements of study design early in the paper                                                                                                                              | 3              |
| Setting                      | 5       | Describe the setting, locations, and relevant dates, including periods of recruitment, exposure, follow-up, and data collection                                                      | 3              |
|                              |         |                                                                                                                                                                                      | 4              |
| Participants                 | 6       | (a) <i>Cross-sectional study</i> —Give the eligibility criteria, and the sources and methods of selection of participants                                                            | 4              |
| Variables                    | 7       | Clearly define all outcomes, exposures, predictors, potential confounders, and effect modifiers. Give diagnostic criteria, if applicable                                             | 4              |
| Data sources/<br>measurement | 8*      | For each variable of interest, give sources of data and details of methods of assessment (measurement). Describe comparability of assessment methods if there is more than one group | 4              |
| Bias                         | 9       | Describe any efforts to address potential sources of bias                                                                                                                            | 3<br>(Ref. 19) |
| Study size                   | 10      | Explain how the study size was arrived at                                                                                                                                            | 3<br>(Ref. 19) |
| Quantitative variables       | 11      | Explain how quantitative variables were handled in the analyses. If applicable, describe which groupings were chosen and why                                                         | 4              |
| Statistical methods          | 12      | (a) Describe all statistical methods, including those used to control for confounding                                                                                                | 4              |
|                              |         | (b) Describe any methods used to examine subgroups and interactions                                                                                                                  | 4              |
|                              |         | (c) Explain how missing data were addressed                                                                                                                                          | 3<br>(Ref. 19) |
|                              |         | (d) <i>Cross-sectional study</i> —If applicable, describe analytical methods taking account of sampling strategy                                                                     | 3<br>(Ref. 19) |
|                              |         | (e) Describe any sensitivity analyses                                                                                                                                                | 3<br>(Ref. 19) |

Continued on next page

|                   |     |                                                                                                                                                                                                              |                                   |
|-------------------|-----|--------------------------------------------------------------------------------------------------------------------------------------------------------------------------------------------------------------|-----------------------------------|
| Results           |     |                                                                                                                                                                                                              |                                   |
| Participants      | 13* | (a) Report numbers of individuals at each stage of study—eg numbers potentially eligible, examined for eligibility, confirmed eligible, included in the study, completing follow-up, and analysed            | 3<br>(Ref. 19)                    |
|                   |     | (b) Give reasons for non-participation at each stage                                                                                                                                                         | 3<br>(Ref. 19)                    |
|                   |     | (c) Consider use of a flow diagram                                                                                                                                                                           | 3<br>(Ref. 19)                    |
| Descriptive data  | 14* | (a) Give characteristics of study participants (eg demographic, clinical, social) and information on exposures and potential confounders                                                                     | 3<br>(Ref. 19)<br>and<br>Table. 2 |
|                   |     | (b) Indicate number of participants with missing data for each variable of interest                                                                                                                          | N/A                               |
| Outcome data      | 15* | <i>Cross-sectional study</i> —Report numbers of outcome events or summary measures                                                                                                                           | 4                                 |
| Main results      | 16  | (a) Give unadjusted estimates and, if applicable, confounder-adjusted estimates and their precision (eg, 95% confidence interval). Make clear which confounders were adjusted for and why they were included | Table. 2                          |
|                   |     | (b) Report category boundaries when continuous variables were categorized                                                                                                                                    | N/A                               |
|                   |     | (c) If relevant, consider translating estimates of relative risk into absolute risk for a meaningful time period                                                                                             | N/A                               |
| Other analyses    | 17  | Report other analyses done—eg analyses of subgroups and interactions, and sensitivity analyses                                                                                                               | N/A                               |
| Discussion        |     |                                                                                                                                                                                                              |                                   |
| Key results       | 18  | Summarise key results with reference to study objectives                                                                                                                                                     | 5                                 |
| Limitations       | 19  | Discuss limitations of the study, taking into account sources of potential bias or imprecision. Discuss both direction and magnitude of any potential bias                                                   | 7                                 |
| Interpretation    | 20  | Give a cautious overall interpretation of results considering objectives, limitations, multiplicity of analyses, results from similar studies, and other relevant evidence                                   | 5                                 |
|                   |     |                                                                                                                                                                                                              | 6                                 |
|                   |     |                                                                                                                                                                                                              | 7                                 |
| Generalizability  | 21  | Discuss the generalisability (external validity) of the study results                                                                                                                                        | 7                                 |
|                   |     |                                                                                                                                                                                                              | 8                                 |
| Other information |     |                                                                                                                                                                                                              |                                   |
| Funding           | 22  | Give the source of funding and the role of the funders for the present study and, if applicable, for the original study on which the present article is based                                                | 8                                 |
