# Supplementary material for: Multimorbidity as an important issue among women: results of a gender difference investigation in a large population-based cross-sectional study in West Asia
Source: PubMed Central journal article supplement — BMJ Open. 2017 May 9;7(5):e013548. doi: 10.1136/bmjopen-2016-013548 (PMC5623450; doi:10.1136/bmjopen-2016-013548), 2017-05-09
Supplement: bmjopen-2016-013548supp001.pdf [file bmjopen-2016-013548supp001.pdf]

Supplementary table 1. Age-adjusted prevalence (95% CI) and slope index of inequalities (SII) of smoking by SES from 2001 to 2014

|               | KNHAENS II (2001)      | KNHANES III (2005) | KNHANES IV (2007-2009) | KNHANES V (2010-2012) | KNHANES VI (2013-2014) |                 |
|---------------|------------------------|--------------------|------------------------|-----------------------|------------------------|-----------------|
| <b>Men</b>    |                        |                    |                        |                       |                        |                 |
| Education(yr) | ≥13                    | 56.6(56.6-56.7)    | 46.6(46.5-46.7)        | 42.0(41.9-42.1)       | 42.6(42.6-42.7)        | 41.9(41.9-42.0) |
|               | 10-12                  | 68.6(68.5-68.7)    | 59.2(59.2-59.3)        | 51.7(51.7-51.8)       | 53.6(53.5-53.6)        | 52.6(52.5-52.6) |
|               | 7-9                    | 67.4(67.3-67.6)    | 58.2(58.0-58.5)        | 63.6(63.4-63.8)       | 63.0(62.7-63.2)        | 44.9(44.7-45.1) |
|               | ≤6                     | 62.6(62.3-62.9)    | 51.2(50.9-51.6)        | 70.0(69.6-70.4)       | 45.8(45.6-46.1)        | 64.4(63.9-64.9) |
|               | SII                    | 9.83               | 8.98                   | 36.53                 | 13.72                  | 20.49           |
|               | P for SII trend        |                    | 0.454                  |                       |                        |                 |
| Income        | Q1 (highest)           | 57.2(57.1-57.2)    | 47.1(47.0-47.1)        | 41.2(41.1-41.2)       | 45.3(45.2-45.4)        | 42.1(42.0-42.1) |
|               | Q2                     | 62.0(61.9-62.1)    | 54.0(53.9-54.0)        | 47.9(47.8-48.0)       | 47.1(47.0-47.1)        | 47.4(47.4-47.5) |
|               | Q3                     | 67.4(67.3-67.5)    | 56.3(56.2-56.3)        | 52.0(52.0-52.1)       | 50.3(50.2-50.3)        | 48.6(48.5-48.7) |
|               | Q4 (lowest)            | 70.5(70.4-70.6)    | 62.1(62.1-62.2)        | 55.5(55.4-55.6)       | 55.1(55.0-55.1)        | 50.1(50.0-50.1) |
|               | SII                    | 17.96              | 19.08                  | 18.92                 | 12.99                  | 9.98            |
|               | P for SII linear trend |                    | 0.105                  |                       |                        |                 |
| <b>Women</b>  |                        |                    |                        |                       |                        |                 |
| Education(yr) | ≥13                    | 2.9(2.9-3.0)       | 2.5(2.4-2.5)           | 2.8(2.8-2.8)          | 4.3(4.3-4.3)           | 2.6(2.6-2.6)    |
|               | 10-12                  | 2.9(2.8-2.9)       | 6.5(6.5-6.6)           | 7.5(7.5-7.5)          | 8.8(8.8-8.9)           | 8.2(8.2-8.3)    |
|               | 7-9                    | 3.4(3.4-3.5)       | 9.2(9.0-9.3)           | 13.2(13.1-13.3)       | 26.9(26.7-27.1)        | 19.4(19.2-19.5) |
|               | ≤6                     | 2.6(2.6-2.6)       | 5.3(5.3-5.4)           | 15.2(15.0-15.4)       | 13.1(12.9-13.3)        | 15.1(14.9-15.3) |
|               | SII                    | -0.01              | 5.27                   | 16.69                 | 20.27                  | 20.55           |
|               | P for SII trend        |                    | 0.009                  |                       |                        |                 |
| Income        | Q1 (highest)           | 3.5(3.5-3.5)       | 3.5(3.5-3.5)           | 4.2(4.2-4.3)          | 4.7(4.7-4.7)           | 2.8(2.8-2.8)    |
|               | Q2                     | 2.4(2.3-2.4)       | 3.9(3.9-4.0)           | 4.1(4.1-4.1)          | 4.6(4.5-4.6)           | 4.4(4.4-4.4)    |
|               | Q3                     | 2.8(2.8-2.8)       | 5.2(5.2-5.2)           | 6.1(6.0-6.1)          | 6.8(6.8-6.8)           | 6.1(6.1-6.2)    |
|               | Q4 (lowest)            | 6.6(6.6-6.7)       | 9.0(9.0-9.1)           | 9.0(9.0-9.0)          | 10.9(10.8-10.9)        | 10.1(10.0-10.1) |
|               | SII                    | 3.82               | 7.22                   | 6.48                  | 8.39                   | 9.38            |
|               | P for SII linear trend |                    | 0.047                  |                       |                        |                 |

Narrow CI's are due to small SE for prevalence by using weighted samples, which are as large as whole population, for direct standardization

Supplementary table 2. Age-adjusted prevalence (95% CI) and slope index of inequalities (SII) of obesity by SES from 2001 to 2014

|               | KNHAES II<br>(2001)    | KNHANES III<br>(2005) | KNHANES IV<br>(2007-2009) | KNHANES V<br>(2010-2012) | KNHANES VI<br>(2013-2014) |                 |
|---------------|------------------------|-----------------------|---------------------------|--------------------------|---------------------------|-----------------|
| <b>Men</b>    |                        |                       |                           |                          |                           |                 |
| Education(yr) | ≥13                    | 36.4(36.3-36.5)       | 40.0(39.9-40.1)           | 41.8(41.7-41.8)          | 40.8(40.8-40.9)           | 41.4(41.3-41.4) |
|               | 10-12                  | 33.1(33.0-33.1)       | 37.9(37.9-38.0)           | 39.9(39.8-39.9)          | 38.8(38.8-38.9)           | 42.1(42.0-42.1) |
|               | 7-9                    | 33.2(33.1-33.3)       | 45.1(44.9-45.3)           | 41.3(41.1-41.5)          | 40.3(40.2-40.5)           | 32.9(32.8-33.1) |
|               | ≤6                     | 28.6(28.4-28.7)       | 17.2(17.1-17.2)           | 41.2(41.1-41.5)          | 29.0(28.7-29.2)           | 47.6(47.2-48.0) |
|               | SII                    | -8.22                 | -16.56                    | -0.50                    | -10.54                    | 0.08            |
|               | P for SII trend        |                       | 0.542                     |                          |                           |                 |
| Income        | Q1 (highest)           | 33.9(33.8-34.0)       | 42.3(42.8-42.9)           | 40.0(40.0-40.1)          | 41.7(41.6-41.8)           | 42.2(42.2-42.3) |
|               | Q2                     | 35.4(35.4-35.5)       | 40.0(40.0-40.1)           | 40.5(40.4-40.6)          | 38.9(38.8-39.0)           | 39.4(39.3-39.5) |
|               | Q3                     | 32.0(31.9-32.1)       | 34.2(34.1-34.2)           | 40.2(40.2-40.3)          | 40.9(40.8-40.9)           | 45.6(45.5-45.6) |
|               | Q4 (lowest)            | 34.3(34.3-34.4)       | 35.4(35.4-35.5)           | 39.0(38.9-39.1)          | 34.5(34.4-34.5)           | 38.5(38.4-38.5) |
|               | SII                    | -0.88                 | -11.40                    | -1.36                    | -7.97                     | -2.05           |
|               | P for SII linear trend |                       | 0.940                     |                          |                           |                 |
| <b>Women</b>  |                        |                       |                           |                          |                           |                 |
| Education(yr) | ≥13                    | 18.0(17.9-18.1)       | 19.1(18.9-19.2)           | 16.7(16.6-16.8)          | 18.9(18.9-19.0)           | 16.1(16.0-16.1) |
|               | 10-12                  | 30.0(29.9-30.1)       | 28.8(28.7-28.9)           | 24.8(24.7-24.8)          | 29.9(29.9-30.0)           | 24.3(24.3-24.4) |
|               | 7-9                    | 49.8(49.7-50.0)       | 35.2(35.1-35.3)           | 31.4(31.3-31.5)          | 37.0(36.8-37.1)           | 32.2(32.1-32.4) |
|               | ≤6                     | 38.0(37.8-38.2)       | 34.5(34.4-34.6)           | 42.9(42.7-43.2)          | 35.1(34.9-35.3)           | 50.8(50.5-51.2) |
|               | SII                    | 32.50                 | 21.32                     | 31.76                    | 23.51                     | 40.66           |
|               | P for SII trend        |                       | 0.487                     |                          |                           |                 |
| Income        | Q1 (highest)           | 27.2(27.1-27.3)       | 23.8(23.7-23.8)           | 22.5(22.5-22.6)          | 21.6(21.6-21.7)           | 16.2(16.1-16.2) |
|               | Q2                     | 30.0(29.9-30.1)       | 31.5(31.5-31.6)           | 23.5(23.5-23.6)          | 26.6(26.5-26.6)           | 24.0(24.0-24.1) |
|               | Q3                     | 31.3(31.2-31.4)       | 30.9(30.8-31.0)           | 29.8(29.7-29.9)          | 29.2(29.1-29.3)           | 27.6(27.6-27.7) |
|               | Q4 (lowest)            | 35.0(34.9-35.0)       | 33.1(33.0-33.1)           | 31.7(31.6-31.7)          | 33.7(33.7-33.8)           | 29.9(29.8-29.9) |
|               | SII                    | 9.76                  | 10.78                     | 13.43                    | 15.53                     | 17.86           |
|               | P for SII linear trend |                       | 0.023                     |                          |                           |                 |

Narrow CI's are due to small SE for prevalence by using weighted samples, which are as large as whole population, for direct standardization

Supplementary table 3. Age-adjusted prevalence (95% CI) and slope index of inequalities (SII) of diabetes by SES from 2005 to 2014

|               | KNHANES III<br>(2005)  | KNHANES IV<br>(2007-2009) | KNHANES V<br>(2010-2012) | KNHANES VI<br>(2013-2014) |                 |
|---------------|------------------------|---------------------------|--------------------------|---------------------------|-----------------|
| <b>Men</b>    |                        |                           |                          |                           |                 |
| Education(yr) | ≥13                    | 8.1(8.1-8.1)              | 8.3(8.2-8.3)             | 7.3(7.3-7.3)              | 8.9(8.9-8.9)    |
|               | 10-12                  | 9.4(9.4-9.5)              | 8.9(8.9-8.9)             | 9.5(9.5-9.5)              | 10.3(10.3-10.4) |
|               | 7-9                    | 11.3(11.2-11.4)           | 10.1(10.0-10.2)          | 9.1(9.0-9.1)              | 14.2(14.1-14.3) |
|               | ≤6                     | 10.2(10.2-10.3)           | 7.6(7.6-7.7)             | 11.1(10.9-11.2)           | 9.4(9.4-9.5)    |
|               | SII                    | 3.56                      | 0.41                     | 4.13                      | 3.66            |
|               | P for SII trend        |                           |                          | 0.602                     |                 |
| Income        | Q1 (highest)           | 10.4(10.3-10.4)           | 7.9(7.9-8.0)             | 9.3 (9.2-9.3)             | 9.5(9.5-9.6)    |
|               | Q2                     | 6.6(6.6-6.6)              | 8.6(8.6-8.6)             | 7.3(7.3-7.3)              | 8.1(8.1-8.2)    |
|               | Q3                     | 9.0(9.0-9.0)              | 7.8(7.8-7.9)             | 8.6(8.6-8.7)              | 9.8(9.8-9.8)    |
|               | Q4 (lowest)            | 10.4(10.3-10.4)           | 11.4(11.3-11.4)          | 9.8(9.7-9.8)              | 12.1(12.1-12.2) |
|               | SII                    | 1.05                      | 3.75                     | 1.16                      | 3.83            |
|               | P for SII linear trend |                           |                          | 0.576                     |                 |
| <b>Women</b>  |                        |                           |                          |                           |                 |
| Education(yr) | ≥13                    | 0.6(0.6-0.6)              | 2.8(2.8-2.8)             | 3.8(3.8-3.8)              | 3.9(3.8-3.9)    |
|               | 10-12                  | 5.8(5.7-5.8)              | 5.2(5.1-5.2)             | 5.5(5.5-5.5)              | 5.6(5.6-5.7)    |
|               | 7-9                    | 7.7(7.6-7.7)              | 5.3(5.3-5.4)             | 5.0(5.0-5.1)              | 7.5(7.4-7.5)    |
|               | ≤6                     | 7.2(7.1-7.2)              | 9.2(9.1-9.2)             | 8.1(8.1-8.2)              | 7.3(7.3-7.4)    |
|               | SII                    | 8.92                      | 7.00                     | 4.55                      | 5.06            |
|               | P for SII trend        |                           |                          | 0.048                     |                 |
| Income        | Q1 (highest)           | 6.1(6.1-6.1)              | 3.9(3.9-4.0)             | 2.9(2.8-2.9)              | 4.3(4.3-4.3)    |
|               | Q2                     | 5.1(5.1-5.1)              | 4.2(4.1-4.2)             | 4.9(4.9-5.0)              | 4.6(4.6-4.6)    |
|               | Q3                     | 6.4(6.4-6.4)              | 6.7(6.7-6.7)             | 6.4(6.3-6.4)              | 5.1(5.0-5.1)    |
|               | Q4 (lowest)            | 4.4(4.1-4.4)              | 7.5(7.5-7.5)             | 6.9(6.8-6.9)              | 7.9(7.9-7.9)    |
|               | SII                    | -1.51                     | 5.26                     | 5.31                      | 4.45            |
|               | P for SII linear trend |                           |                          | 0.016                     |                 |

Narrow CI's are due to small SE for prevalence by using weighted samples, which are as large as whole population, for direct standardization

Supplementary table 4. Age-adjusted prevalence (95% CI) and slope index of inequalities (SII) of hypertension by SES from 2001 to 2014

|                        | KNHANES II<br>(2001) | KNHANES III<br>(2005) | KNHANES IV<br>(2007-2009) | KNHANES V<br>(2010-2012) | KNHANES VI<br>(2013-2014) |                 |
|------------------------|----------------------|-----------------------|---------------------------|--------------------------|---------------------------|-----------------|
| <b>Men</b>             |                      |                       |                           |                          |                           |                 |
| Education(yr)          | ≥13                  | 24.9(24.8-24.9)       | 24.7(24.7-24.8)           | 22.6(22.6-22.7)          | 24.7(24.6-24.7)           | 25.3(25.2-25.3) |
|                        | 10-12                | 30.6(30.5-30.7)       | 25.9(25.8-25.9)           | 23.5(23.5-23.6)          | 27.1(27.1-27.2)           | 25.2(25.2-25.3) |
|                        | 7-9                  | 28.3(28.2-28.4)       | 27.1(27.0-27.1)           | 21.9(21.9-22.0)          | 24.9(24.8-25.0)           | 23.7(23.5-23.8) |
|                        | ≤6                   | 28.2(28.0-28.3)       | 25.0(25.0-25.1)           | 24.7(24.6-24.9)          | 29.1(28.9-29.3)           | 28.5(28.2-28.7) |
|                        | SII                  | 3.96                  | 1.52                      | 1.37                     | 3.75                      | 1.79            |
| P for SII trend        |                      |                       |                           |                          |                           |                 |
| Income                 | Q1 (highest)         | 24.3(24.2-24.3)       | 26.3(26.3-26.4)           | 21.7(21.6-21.7)          | 24.4(24.4-24.5)           | 23.6(23.5-23.6) |
|                        | Q2                   | 27.8(27.8-27.9)       | 24.9(24.8-24.9)           | 23.1(23.0-23.1)          | 27.0(27.0-27.1)           | 28.4(28.4-28.5) |
|                        | Q3                   | 26.6(26.5-26.6)       | 26.0(25.9-26.1)           | 23.5(23.4-23.5)          | 26.5(26.4-26.5)           | 25.3(25.3-25.4) |
|                        | Q4 (lowest)          | 32.1(32.1-32.2)       | 30.6(30.6-30.7)           | 25.4(25.3-25.4)          | 26.4(26.3-26.4)           | 24.8(24.7-24.8) |
|                        | SII                  | 8.71                  | 5.86                      | 4.65                     | 2.10                      | 0.15            |
| P for SII linear trend |                      |                       |                           |                          |                           |                 |
| <b>Women</b>           |                      |                       |                           |                          |                           |                 |
| Education(yr)          | ≥13                  | 11.8(11.8-11.9)       | 9.1(8.9-9.2)              | 9.2(9.2-9.3)             | 10.7(10.7-10.8)           | 9.7(9.6-9.71)   |
|                        | 10-12                | 16.7(16.7-16.8)       | 15.1(15.1-15.2)           | 15.9(15.9-16.0)          | 15.1(15.0-15.1)           | 13.0(13.0-13.0) |
|                        | 7-9                  | 22.4(22.3-22.4)       | 19.3(19.2-19.3)           | 17.7(17.6-17.7)          | 20.5(20.4-20.6)           | 19.4(19.3-19.5) |
|                        | ≤6                   | 18.8(18.7-18.8)       | 22.4(22.3-22.5)           | 19.6(19.4-19.7)          | 20.9(20.7-21.0)           | 24.3(24.1-24.4) |
|                        | SII                  | 10.78                 | 17.02                     | 13.10                    | 14.39                     | 18.80           |
| P for SII trend        |                      |                       |                           |                          |                           |                 |
| Income                 | Q1 (highest)         | 15.4(15.3-15.4)       | 14.5(14.5-14.5)           | 13.9(13.8-13.9)          | 14.1(14.1-14.2)           | 9.9(9.8-9.9)    |
|                        | Q2                   | 20.0(20.0-20.1)       | 17.7(17.6-17.7)           | 13.7(13.7-13.8)          | 14.5(14.5-14.6)           | 13.3(13.2-13.3) |
|                        | Q3                   | 17.6(17.5-17.6)       | 17.4(17.4-17.5)           | 16.3(16.3-16.4)          | 17.1(17.0-17.1)           | 18.4(18.4-18.5) |
|                        | Q4 (lowest)          | 18.0(17.9-18.1)       | 18.5(18.4-18.5)           | 17.6(17.5-17.6)          | 18.2(18.1-18.2)           | 15.4(15.3-15.4) |
|                        | SII                  | 2.21                  | 4.62                      | 5.48                     | 5.82                      | 8.71            |
| P for SII linear trend |                      |                       |                           |                          |                           |                 |

Narrow CI's are due to small SE for prevalence by using weighted samples, which are as large as whole population, for direct standardization

Supplementary table 5. Age-adjusted prevalence (95% CI) and slope index of inequalities (SII) of hypercholesterolemia by SES from 2005 to 2014

|                        | KNHANES III<br>(2005) | KNHANES IV<br>(2007-2009) | KNHANES V<br>(2010-2012) | KNHANES VI<br>(2013-2014) |
|------------------------|-----------------------|---------------------------|--------------------------|---------------------------|
| <b>Men</b>             |                       |                           |                          |                           |
| Education(yr) ≥13      | 7.1(7.1-7.1)          | 9.7(9.6-9.7)              | 11.2(11.2-11.3)          | 12.0(12.0-12.2)           |
| 10-12                  | 8.2(8.2-8.2)          | 9.5(9.5-9.6)              | 12.4(12.4-12.4)          | 13.3(13.2-13.3)           |
| 7-9                    | 4.3(4.2-4.3)          | 10.3(10.2-10.3)           | 9.8(9.8-9.9)             | 16.9(16.8-17.1)           |
| ≤6                     | 7.6(7.6-7.7)          | 8.9(8.8-9.0)              | 8.9(8.9-9.0)             | 12.2(12.0-12.4)           |
| SII                    | -1.40                 | -0.28                     | -3.02                    | 2.80                      |
| P for SII trend        |                       |                           | 0.378                    |                           |
| Income Q1 (highest)    | 8.0(8.0-8.1)          | 9.9(9.9-9.9)              | 13.1(13.0-13.1)          | 13.6(13.6-13.7)           |
| Q2                     | 4.8(4.8-4.9)          | 8.7(8.6-8.7)              | 8.9(8.9-8.9)             | 14.7(14.6-14.7)           |
| Q3                     | 7.6(7.6-7.7)          | 8.8(8.7-8.8)              | 12.9(12.9-12.9)          | 10.9(10.9-11.0)           |
| Q4 (lowest)            | 8.9(8.9-9.0)          | 10.2(10.1-10.2)           | 12.4(12.4-12.5)          | 11.5(11.4-11.5)           |
| SII                    | 2.27                  | 0.34                      | 0.86                     | -4.08                     |
| P for SII linear trend |                       |                           | 0.085                    |                           |
| <b>Women</b>           |                       |                           |                          |                           |
| Education(yr) ≥13      | 13.5(13.3-13.6)       | 13.1(13.0-13.2)           | 12.2(12.2-12.3)          | 12.4(12.3-12.4)           |
| 10-12                  | 8.4(8.3-8.4)          | 9.7(9.7-9.8)              | 13.7(13.7-13.8)          | 11.0(11.0-11.0)           |
| 7-9                    | 7.1(7.0-7.1)          | 10.3(10.3-10.4)           | 11.2(11.1-11.2)          | 9.8(9.7-9.8)              |
| ≤6                     | 5.2(5.1-5.2)          | 11.9(11.8-11.9)           | 9.8(9.8-9.9)             | 10.4(10.3-10.4)           |
| SII                    | -10.25                | -1.89                     | -3.27                    | -3.20                     |
| P for SII trend        |                       |                           | 0.177                    |                           |
| Income Q1 (highest)    | 8.0(7.9-8.0)          | 10.2(10.2-10.3)           | 12.4(12.4-12.5)          | 11.8(11.8-11.9)           |
| Q2                     | 7.4(7.4-7.4)          | 9.2(9.2-9.3)              | 12.2(12.1-12.2)          | 9.8(9.8-9.8)              |
| Q3                     | 5.6(5.5-5.6)          | 10.0(10.0-10.0)           | 11.7(11.7-11.8)          | 14.2(14.2-14.3)           |
| Q4 (lowest)            | 7.6(7.6-7.7)          | 10.9(10.9-10.9)           | 13.8(13.8-13.8)          | 11.7(11.6-11.7)           |
| SII                    | -1.08                 | 1.08                      | 1.49                     | 1.58                      |
| P for SII linear trend |                       |                           | 0.535                    |                           |

Narrow CI's are due to small SE for prevalence by using weighted samples, which are as large as whole population, for direct standardization

Supplementary table 6. Comparing difference of SES distribution between responder and non-responder (smoking)

|               |              | Response<br>(n=44433, 98%) |         | Non-response<br>(n=1089, 2%) |         |
|---------------|--------------|----------------------------|---------|------------------------------|---------|
| Education(yr) | ≥13          | 15438                      | (36%)   | 36                           | (27.3%) |
|               | 10-12        | 16815                      | (38.1%) | 49                           | (37.1%) |
|               | 7-9          | 5272                       | (12.0%) | 19                           | (14.4%) |
|               | ≤6           | 6583                       | (14.9%) | 28                           | (21.2%) |
| p-value*      |              | 0.093                      |         |                              |         |
| Income        | Q1 (highest) | 11112                      | (25.5%) | 198                          | (19.5%) |
|               | Q2           | 11032                      | (25.3%) | 235                          | (23.1%) |
|               | Q3           | 10915                      | (25.0%) | 243                          | (23.9%) |
|               | Q4 (lowest)  | 10576                      | (24.2%) | 340                          | (33.5%) |
| p-value*      |              | <0.0001                    |         |                              |         |

\*p-value for chi-square test

(We analyzed the data of health interview for smoking behaviour, total number is 45,522)

Supplementary table 7. Comparing difference of SES distribution between responder and non-responder (obesity)

|               |              | Response<br>(n=42519, 99%) |         | Non-response<br>(n=206, 1%) |         |
|---------------|--------------|----------------------------|---------|-----------------------------|---------|
| Education(yr) | ≥13          | 14399                      | (34.9%) | 47                          | (31.1%) |
|               | 10-12        | 15621                      | (37.8%) | 63                          | (41.7%) |
|               | 7-9          | 4972                       | (12.0%) | 26                          | (17.2%) |
|               | ≤6           | 6284                       | (15.2%) | 15                          | (9.9%)  |
| p-value*      |              | 0.063                      |         |                             |         |
| Income        | Q1 (highest) | 10535                      | (25.3%) | 31                          | (16.2%) |
|               | Q2           | 10516                      | (25.2%) | 44                          | (23.0%) |
|               | Q3           | 10453                      | (25.1%) | 51                          | (26.7%) |
|               | Q4 (lowest)  | 10218                      | (24.5%) | 65                          | (34.0%) |
| p-value*      |              | 0.003                      |         |                             |         |

\* p-value for chi-square test

Supplementary table 8. Comparing difference of SES distribution between responder and non-responder (diabetes)

|               |              | Response<br>(n=34257, 92%) |         | Non-response<br>(n=3262, 8%) |         |
|---------------|--------------|----------------------------|---------|------------------------------|---------|
| Education(yr) | ≥ 13         | 12308                      | (36.0%) | 670                          | (32.8%) |
|               | 10-12        | 12810                      | (37.5%) | 752                          | (36.8%) |
|               | 7-9          | 3975                       | (11.6%) | 258                          | (12.6%) |
|               | ≤ 6          | 5095                       | (14.9%) | 363                          | (17.8%) |
| p-value*      |              | 0.001                      |         |                              |         |
| Income        | Q1 (highest) | 8652                       | (25.5%) | 655                          | (21.0%) |
|               | Q2           | 8561                       | (25.3%) | 700                          | (22.4%) |
|               | Q3           | 8517                       | (25.1%) | 782                          | (25.0%) |
|               | Q4 (lowest)  | 8148                       | (24.1%) | 988                          | (31.6%) |
| p-value*      |              | <0.001                     |         |                              |         |

\*p-value for chi-square test

(We analyzed only the data of KNHANES III (2005) to VI (2014) for diabetes, total number is 37,519)

Supplementary table 9. Comparing difference of SES distribution between responder and non-responder (hypertension)

|               |              | Response<br>(n=40904, 96%) |         | Non-response<br>(n=1821, 4%) |         |
|---------------|--------------|----------------------------|---------|------------------------------|---------|
| Education(yr) | ≥ 13         | 14265                      | (35.0%) | 181                          | (29.4%) |
|               | 10-12        | 15430                      | (37.8%) | 254                          | (41.3%) |
|               | 7-9          | 4908                       | (12.0%) | 90                           | (14.6%) |
|               | ≤ 6          | 6209                       | (15.2%) | 90                           | (14.6%) |
| p-value*      |              | 0.013                      |         |                              |         |
| Income        | Q1 (highest) | 10176                      | (25.3%) | 390                          | (23.0%) |
|               | Q2           | 10149                      | (25.2%) | 411                          | (24.2%) |
|               | Q3           | 10102                      | (25.1%) | 402                          | (23.7%) |
|               | Q4 (lowest)  | 9788                       | (24.3%) | 495                          | (29.2%) |
| p-value*      |              | <0.001                     |         |                              |         |

\*p-value for chi-square test

Supplementary table 10. Comparing difference of SES distribution between responder and non-responder (hypercholesterolemia)

|               |              | Response<br>(n=34226, 91%) |         | Non-response<br>(n=3293, 9%) |         |
|---------------|--------------|----------------------------|---------|------------------------------|---------|
| Education(yr) | ≥ 13         | 12298                      | (36.0%) | 680                          | (32.8%) |
|               | 10-12        | 12794                      | (37.5%) | 768                          | (37.0%) |
|               | 7-9          | 3972                       | (11.6%) | 261                          | (12.6%) |
|               | ≤ 6          | 5093                       | (14.9%) | 365                          | (17.6%) |
| p-value*      |              | <0.001                     |         |                              |         |
| Income        | Q1 (highest) | 8645                       | (25.5%) | 662                          | (21.0%) |
|               | Q2           | 8552                       | (25.3%) | 709                          | (22.5%) |
|               | Q3           | 8508                       | (25.1%) | 791                          | (25.1%) |
|               | Q4 (lowest)  | 8142                       | (24.1%) | 994                          | (31.5%) |
| p-value*      |              | <0.001                     |         |                              |         |

\*p-value for chi-square test

(We analyzed only the data of KNHANES III (2005) to VI (2014) for hypercholesterolemia, total number is 37,519)
